# Supplementary material
Source: PubMed Central journal article supplement (PMC9395273)
Supplement: 41589_2022_1047_MOESM1_ESM.pdf [file 41589_2022_1047_MOESM1_ESM.pdf]

---

**Supplementary information**

---

**MNK2 deficiency potentiates  $\beta$ -cell  
regeneration via translational regulation**

---

In the format provided by the  
authors and unedited

## Supplementary Note 1

### **Compilation of Experimental Protocols of the Synthesis of 7-hydroxy-3-methyl-5-oxo-2,3-dihydro-1*H*,5*H*- pyrido[3,2,1-*ij*]quinoline-6-carboxylic acid Derivatives**

Chemical synthesis information for CID661578.6 (**2**), CID661578.6-derived bait (**3**) and analogues in Extended Data Figure 1

## Content

|                                                                                                                                                                                                           |           |
|-----------------------------------------------------------------------------------------------------------------------------------------------------------------------------------------------------------|-----------|
| <b>1. INTRODUCTION .....</b>                                                                                                                                                                              | <b>3</b>  |
| <b>2. GENERAL METHODS .....</b>                                                                                                                                                                           | <b>4</b>  |
| <b>3. SYNTHESIS OF AMIDES WITH THE 7-HYDROXY-3-METHYL-5-OXO-2,3-DIHYDRO-1<i>H</i>,5<i>H</i>-PYRIDO[3,2,1-<i>IJ</i>]QUINOLINE-6-CARBOXAMIDE CORES .....</b>                                                | <b>4</b>  |
| 3.1 QUINOLINE REDUCTION .....                                                                                                                                                                             | 4         |
| 3.2 CYCLIZATION .....                                                                                                                                                                                     | 5         |
| 3.3 ESTER HYDROLYSIS .....                                                                                                                                                                                | 6         |
| 3.4 CONCOMINANT ETHER AND ESTER CLEAVAGE .....                                                                                                                                                            | 7         |
| 3.5 AMIDE COUPLINGS .....                                                                                                                                                                                 | 8         |
| <b>4. SYNTHESIS OF TRIMETHOPRIM-PEG<sub>6</sub>-<i>N</i>-(3-(2-AMINO-2-OXOETHYL)BENZYL)-7-HYDROXY-3-METHYL-5-OXO-2,3-DIHYDRO-1<i>H</i>,5<i>H</i>-PYRIDO[3,2,1-<i>IJ</i>]QUINOLINE-6-CARBOXAMIDE .....</b> | <b>10</b> |
| 4.1 AMIDE COUPLING OF CORE MOLECULE WITH 3-(METHOXYCARBONYLMETHYL)BENZYLAMINE .....                                                                                                                       | 10        |
| 4.2 ESTER HYDROLYSIS .....                                                                                                                                                                                | 11        |
| 4.3 AMIDE COUPLING WITH H <sub>2</sub> N-PEG <sub>6</sub> -TMP .....                                                                                                                                      | 11        |
| 4.4 CHROMATOGRAMS AND MASS-SPECTRA OF THE FINAL PRODUCT .....                                                                                                                                             | 12        |

## 1. Introduction

Karolinska Institutet's Department of Cell and Molecular Biology as represented by Assoc. Prof. Olov Andersson (the customer) tasked Recipharm with compiling experimental protocols for the synthesis of 7-hydroxy-3-methyl-5-oxo-2,3-dihydro-1*H*,5*H*-pyrido[3,2,1-*ij*]quinoline-6-carboxylic acid derivatives.

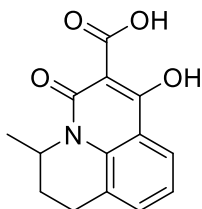

7-hydroxy-3-methyl-5-oxo-2,3-dihydro-1*H*,5*H*-pyrido[3,2,1-*ij*]quinoline-6-carboxylic acid core

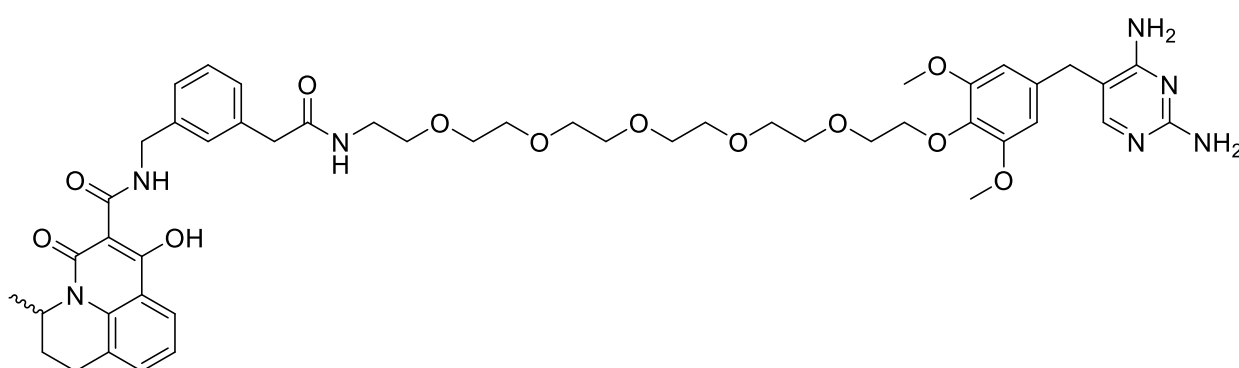

H<sub>2</sub>N-PEG<sub>6</sub>-TMP-amide of the core molecule

## 2. General Methods

All solvents were obtained from Chemtronica (Solna, Sweden) and were not purified or dried prior to use. H<sub>2</sub>N-PEG<sub>6</sub>-TMP was supplied by Hybrigenics SA (Evry, France). All other reagents were obtained from Sigma-Aldrich (Stockholm, Sweden). Reactions were monitored using an Agilent 1100 series Liquid Chromatograph/Mass Selective Detector (MSD) (Single Quadrupole) equipped with an electrospray interface, a UV diode array detector and an ACE3 C8 (3.0 x 50 mm) column with a gradient of acetonitrile (10→97%) in 0.1% aqueous 2,2,2-trifluoroacetic acid over 3 min and a flow of 1 mL/min or an XBridge C18 (3.0 x 50mm) column with a gradient of acetonitrile (5→97%) in 10mM aqueous ammonium bicarbonate. Purification by means of preparative liquid chromatography were performed using a Gilson HPLC System equipped with a model 119 UV/Vis detector, a series 306 binary pump, an FC204 fraction collector and an ACE3 C18-HL (250 x 21.2 mm) column with a gradient of acetonitrile in 0.1% aqueous 2,2,2-trifluoroacetic acid over 10 min and a flow of 25 mL/min.

## 3. Synthesis of amides with the 7-Hydroxy-3-methyl-5-oxo-2,3-dihydro-1*H*,5*H*-pyrido[3,2-*ij*]quinoline-6-carboxamide cores

### 3.1 Quinoline reduction

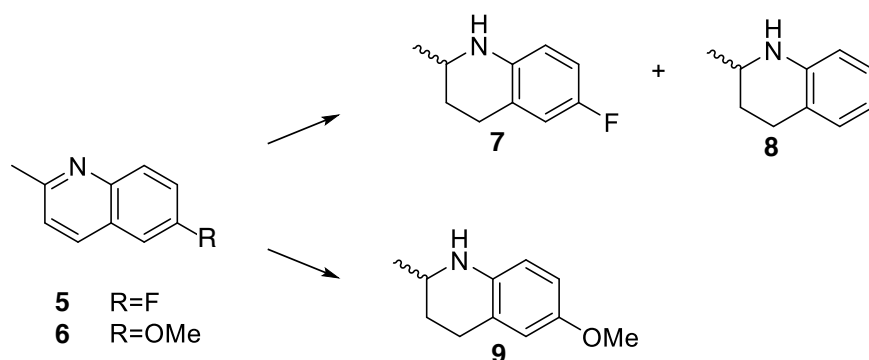

### 6-Fluoro-2-methyl-1,2,3,4-tetrahydroquinoline (**7**) and 2-methyl-1,2,3,4-tetrahydroquinoline (**8**)

6-Fluoro-2-methylquinoline (**5**, 300mg, 1.86mmol, 1.0eq.) was weighed into a flame-dried 50mL round-bottom flask, followed by PtO<sub>2</sub> (42mg, 0.19mmol, 0.1eq.) and a stirbar. The flask was sealed with a septum, the atmosphere was evacuated and backfilled with nitrogen three times. MeOH (7.5mL) and TFA (0.14mL, 1.0eq.) were added by syringe and a hydrogen atmosphere was applied. The resulting suspension was stirred at room temperature overnight. After approximately 18 hours, the solids were removed with the help of a syringe filter and the latter was washed with MeOH (2.5mL). Incrementally and while stirring, aqueous NH<sub>4</sub>HCO<sub>3</sub> (20mL, 50mM) was added to neutralize the acid, and the resulting suspension was extracted with EtOAc (3 x 20 mL). The organic layers were pooled, dried over sodium sulfate and the solvent was removed *in vacuo* to yield an oily residue, which was filtered through silica (heptane/EtOAc 4:1) to yield a mixture of **7** and **8** in a ratio of approximately 4:1 (153mg) as a light brown oil, which corresponds to a yield of approximately 51% when taking into account the different molecular weights of the products. The mixture of the two compounds was used in the subsequent step without further purification. MS/ESI positive ionization: m/z=166 [M+H]<sup>+</sup> (**7**) and m/z=148 [M+H]<sup>+</sup> (**8**).

### 6-Methoxy-2-methyl-1,2,3,4-tetrahydroquinoline (9)

An analogous procedure was used for the reduction of 300mg of 6-methoxy-2-methylquinoline (**6**) to **9**. The final filtration through silica was performed using DCM/MeOH/NEt<sub>3</sub> (19:1 + 0.1%) as the eluent. **9** was obtained as a light brown oil in 60% yield (183mg). The latter was used in the subsequent step without further purification. MS/ESI positive ionization: m/z=178 [M+H]<sup>+</sup>.

### 3.2 Cyclization

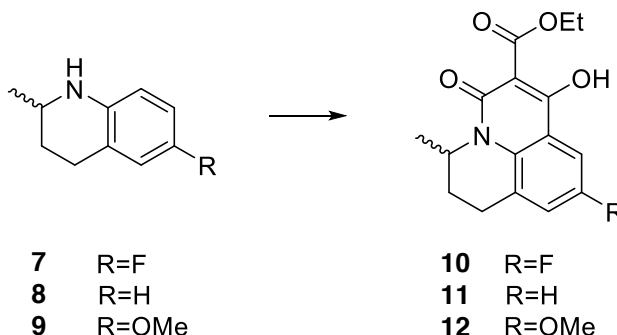

#### Ethyl 9-fluoro-7-hydroxy-3-methyl-5-oxo-2,3-dihydro-1H,5H-pyrido[3,2,1-ij]quinoline-6-carboxylate (**10**) and ethyl 7-hydroxy-3-methyl-5-oxo-2,3-dihydro-1H,5H-pyrido[3,2,1-ij]quinoline-6-carboxylate (**11**)

An open, 15mL microwave tube was charged with triethyl methanetricarboxylate (0.21mL, 0.99mmol, 3.3eq.) and a stir bar. The vial was immersed into a steel block approximately halfway and heated to 225°C while stirring, causing the triester to gently reflux inside of the vial. A mixture of compounds **7** and **8** (approximately 4:1 ratio, 49mg, 0.30mmol, 1.0eq.) was added by micropipette. The resulting solution was stirred at 225°C for 30 minutes, whereupon it was allowed to attain room temperature. Aqueous Na<sub>2</sub>CO<sub>3</sub> (10% w/w, 15mL) was added, the resulting mixture was heated to 80°C for 20 minutes and the solids were removed by filtration. Once the aqueous layer had obtained room temperature, activated charcoal (approx. 300mg) was added, the resulting suspension was stirred for 20 minutes, filtered and the solids were washed with hot water (approx. 50mL). While cooling on ice, the new aqueous layer was acidified with 4M aqueous HCl to precipitate a mixture of **10** and **11** in a ratio of approximately 4:1 (64mg) as an off-white solid, which corresponds to a yield of approximately 71% when taking into account the different molecular weights of the products. The mixture of the two compounds was used in the subsequent step without further purification. MS/ESI positive ionization: m/z=306 [M+H]<sup>+</sup> (**10**) and m/z=288 [M+H]<sup>+</sup> (**11**).

#### Ethyl 7-hydroxy-9-methoxy-3-methyl-5-oxo-2,3-dihydro-1H,5H-pyrido[3,2,1-ij]quinoline-6-carboxylate (**12**)

An analogous procedure was used for the conversion of 101mg of 6-methoxy-2-methyl-1,2,3,4-tetrahydroquinoline (**9**) to **12**, which was obtained as an off-white solid in 56% yield (102mg) after an additional recrystallization from acetonitrile. The product was used in the subsequent step without further purification. MS/ESI positive ionization: m/z=318 [M+H]<sup>+</sup>.

## 3.3 Ester hydrolysis

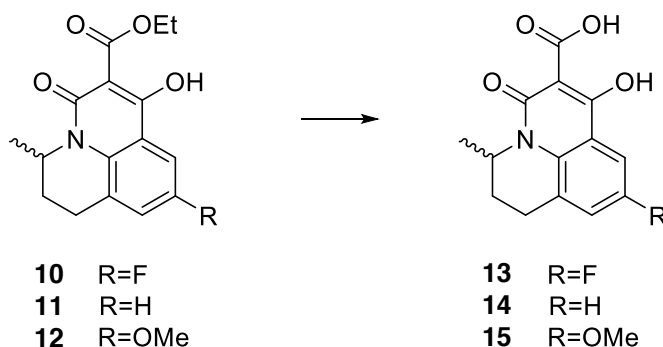

**9-Fluoro-7-hydroxy-3-methyl-5-oxo-2,3-dihydro-1H,5H-pyrido[3,2,1-ij]quinoline-6-carboxylic acid (13)** and

**7-hydroxy-3-methyl-5-oxo-2,3-dihydro-1H,5H-pyrido[3,2,1-ij]quinoline-6-carboxylic acid (14)**

A 5 mL roundbottom flask was charged with a mixture of compounds **10** and **11** (approximately 4:1 ratio, 64mg, 0.21mmol), followed by a stir bar, glacial AcOH (2mL) and concentrated aqueous HCl (0.2mL, 35% w/w). A reflux condenser was installed and while stirring, the mixture was heated to 60°C, where it was kept overnight. After approximately 16 hours, the mixture was allowed cooled on ice for 20 minutes, and the solids were collected by filtration. The solids were washed with 1M HCl (1mL) and thereafter dried under fine vacuum overnight to obtain **13** and **14** in a ratio of approximately 4:1 (54 mg) as an off white solid, which corresponds to a yield of approximately 94% when taking into account the different molecular weights of the products. The mixture of the two compounds was used in the subsequent step without further purification. MS/ESI positive ionization:  $m/z=278$   $[M+H]^+$  (**13**) and  $m/z=260$   $[M+H]^+$  (**14**).

**7-Hydroxy-9-methoxy-3-methyl-5-oxo-2,3-dihydro-1H,5H-pyrido[3,2,1-ij]quinoline-6-carboxylic acid (15)**

An analogous procedure was used for the conversion of 102mg of ethyl 7-hydroxy-9-methoxy-3-methyl-5-oxo-2,3-dihydro-1H,5H-pyrido[3,2,1-ij]quinoline-6-carboxylate (**12**) to **15**, which was obtained as an off-white solid in 97% yield (90mg). The product was used in the subsequent step without further purification. MS/ESI positive ionization:  $m/z=290$   $[M+H]^+$ .

## 3.4 Concomitant ether and ester cleavage

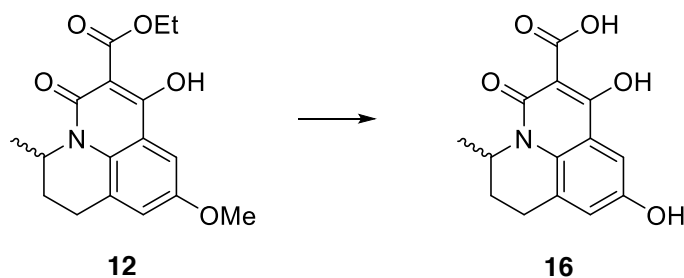**7,9-Dihydroxy-3-methyl-5-oxo-2,3-dihydro-1H,5H-pyrido[3,2,1-ij]quinoline-6-carboxylic acid (16)**

Ethyl 7-hydroxy-9-methoxy-3-methyl-5-oxo-2,3-dihydro-1H,5H-pyrido[3,2,1-ij]quinoline-6-carboxylate (**12**, 50mg, 0.16mmol) was dissolved in hydrogen bromide in acetic acid (33% w/w, 5mL) inside of a 50mL roundbottom flask and the resulting solution was heated to reflux for 12 hours. The reflux condenser was then removed to allow for the evaporation of hydrogen bromide,<sup>1</sup> the volume of the resulting mixture was reduced to about 1mL using a rotary evaporator and water (3mL) and MeCN (9mL) were added to yield a slightly brown solution. The latter was slowly concentrated in vacuo, until the desired product began to precipitate. The mixture was cooled on ice for one hour and the solids were collected by filtration. **16** was obtained in 55% yield (24mg) as a faintly brown solid. The product was used in the subsequent step without further purification. MS/ESI positive ionization: m/z=276 [M+H]<sup>+</sup>.

---

<sup>1</sup> Due to the extreme corrosiveness of hydrogen bromide vapors, they were sucked off using a suction pump, where the gas was automatically diluted with water.



## 3.5 Amide Couplings

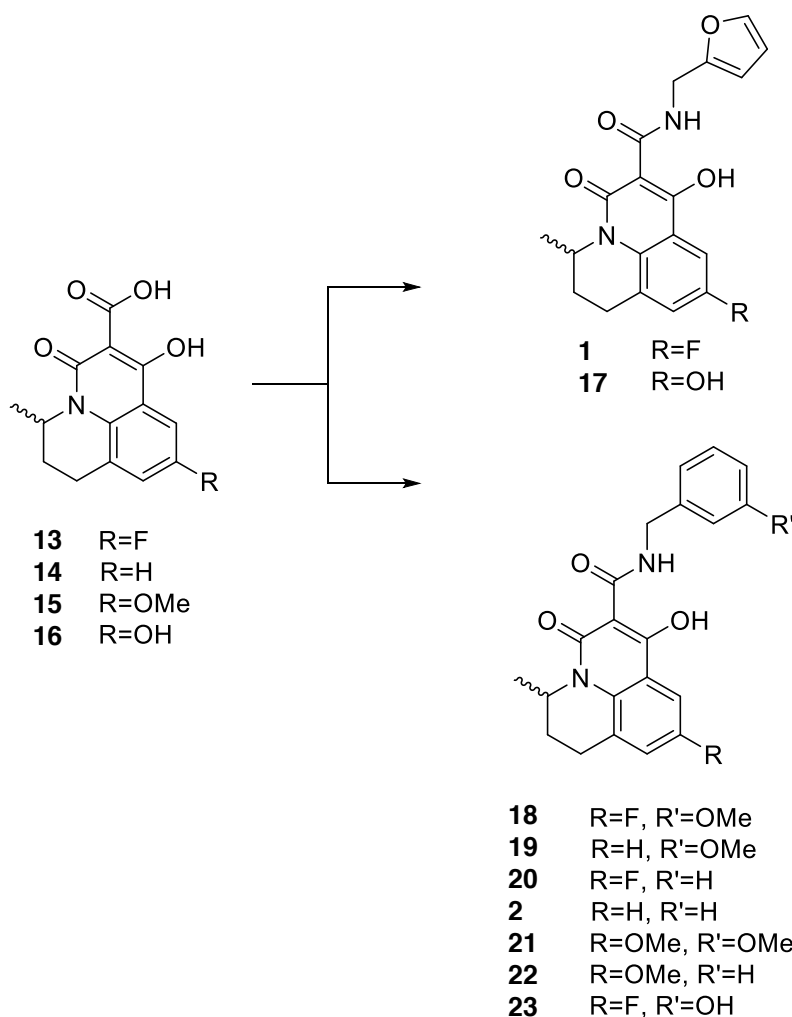

Amide couplings were performed in ethyl acetate, using propylphosphonic anhydride (T3P®) as the coupling reagent and triethylamine as a base. The synthesis of compounds **18** and **19** is exemplary.

**9-Fluoro-7-hydroxy-N-(3-methoxybenzyl)-3-methyl-5-oxo-2,3-dihydro-1H,5H-pyrido[3,2,1-ij]quinoline-6-carboxamide (18)** and  
**7-hydroxy-N-(3-methoxybenzyl)-3-methyl-5-oxo-2,3-dihydro-1H,5H-pyrido[3,2,1-ij]quinoline-6-carboxamide (19)**

A 4mL vial was charged with a mixture of compounds **13** and **14** (approximately 4:1 ratio, 30mg, 0.11mmol). Added were EtOAc (0.9mL), followed by a stirbar and triethylamine (18μL, 0.12mmol, 1.1eq.). A solution of (3-methoxybenzyl)amine (40mg, 0.32mmol, 3.0eq.) in EtOAc (0.1mL) was added and finally, T3P-solution (≥50%w/w in EtOAc, 130μL, 0.22mmol, 2.0eq.) was added by micropipette. The resulting solution was stirred at room temperature over night. The resulting suspension was diluted with EtOAc (9mL), washed with water (5mL), and concentrated to dryness. The semi-solid residue was taken up in MeCN (3mL), aqueous TFA was added (0.5%, 1mL) and the resulting yellow solution was purified by preparative HPLC (60→80% MeCN in 0.5% aq. TFA, C18 column, ACE) to yield: **18** in 29% yield (17mg) and **19** in 10% yield (4mg), each as an off-white solid. MS/ESI positive ionization: m/z= 397 [M+H]<sup>+</sup> (**18**) and m/z=379 [M+H]<sup>+</sup> (**19**).

**9-Fluoro-*N*-(furan-2-ylmethyl)-7-hydroxy-3-methyl-5-oxo-2,3-dihydro-1*H*,5*H*-pyrido[3,2,1-*ij*]quinoline-6-carboxamide (1)**

20mg of **13** (contaminated with approx. 20% of 14) were converted to **1** by T3P-mediated amide coupling with furfurylamine. **1** was obtained in 34% yield (26mg) as an off-white solid. MS/ESI positive ionization:  $m/z = 357 [M+H]^+$ .

***N*-(furan-2-ylmethyl)-7,9-dihydroxy-3-methyl-5-oxo-2,3-dihydro-1*H*,5*H*-pyrido[3,2,1-*ij*]quinoline-6-carboxamide (17)**

107mg of **16** were converted to **17** by T3P-mediated amide coupling with furfurylamine. The reaction was noticeably less clean owing perhaps to instability of the phenol-group in the presence of phosphonic anhydride. **17** was obtained in 5% yield (7mg) as an off-white solid. MS/ESI positive ionization:  $m/z = 355 [M+H]^+$ .

***N*-benzyl-9-fluoro-7-hydroxy-3-methyl-5-oxo-2,3-dihydro-1*H*,5*H*-pyrido[3,2,1-*ij*]quinoline-6-carboxamide (20) and*****N*-benzyl-7-hydroxy-3-methyl-5-oxo-2,3-dihydro-1*H*,5*H*-pyrido[3,2,1-*ij*]quinoline-6-carboxamide (2)**

35mg of **13** and **14** were converted to **20** and **2** by T3P-mediated amide coupling with benzylamine. **20** was obtained in 21% yield (10mg) and **2** was obtained in 10% yield (5mg), each as an off-white solid. MS/ESI positive ionization:  $m/z = 367 [M+H]^+$  (**20**) and  $m/z = 349 [M+H]^+$  (**2**).

**7-Hydroxy-9-methoxy-*N*-(3-methoxybenzyl)-3-methyl-5-oxo-2,3-dihydro-1*H*,5*H*-pyrido[3,2,1-*ij*]quinoline-6-carboxamide (21)**

44mg of **15** were converted to **21** by T3P-mediated amide coupling with (3-methoxybenzyl)amine. **21** was obtained in 60% yield (9mg) as an off-white solid. MS/ESI positive ionization:  $m/z = 409 [M+H]^+$ .

***N*-benzyl-7-hydroxy-9-methoxy-3-methyl-5-oxo-2,3-dihydro-1*H*,5*H*-pyrido[3,2,1-*ij*]quinoline-6-carboxamide (22)**

47mg of **15** were converted to **22** by T3P-mediated amide coupling with benzylamine. **22** was obtained in 35% yield (21mg) as an off-white solid. MS/ESI positive ionization:  $m/z = 379 [M+H]^+$ .

**9-Fluoro-7-hydroxy-*N*-(3-hydroxybenzyl)-3-methyl-5-oxo-2,3-dihydro-1*H*,5*H*-pyrido[3,2,1-*ij*]quinoline-6-carboxamide (23)**

40mg of **13** (contaminated with approx. 20% of 14) were converted to **23** by T3P-mediated amide coupling with (3-hydroxybenzyl)amine. The reaction was noticeably less clean owing perhaps to instability of the phenol-group in the presence of phosphonic anhydride. A total of ten molar equivalents of amine were added, instead of the usual three. **23** was obtained in 5% yield (3mg) as a yellow syrup. MS/ESI positive ionization:  $m/z = 383 [M+H]^+$ .

#### 4. Synthesis of trimethoprim-PEG<sub>6</sub>-N-(3-(2-amino-2-oxoethyl)benzyl)-7-hydroxy-3-methyl-5-oxo-2,3-dihydro-1*H*,5*H*-pyrido[3,2,1-*ij*]quinoline-6-carboxamide

##### 4.1 Amide coupling of core molecule with 3-(Methoxycarbonylmethyl)benzylamine

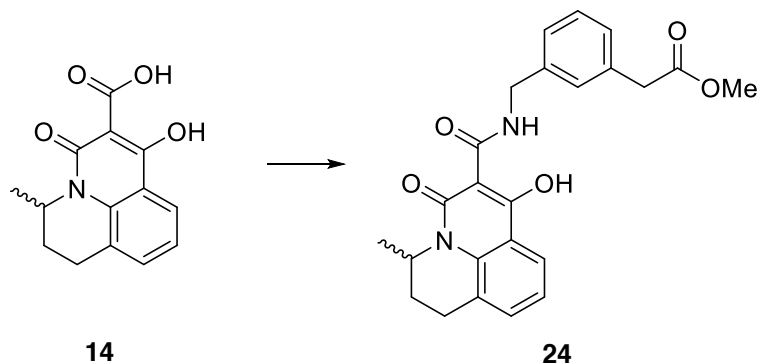

##### **Methyl 2-(3-((7-hydroxy-3-methyl-5-oxo-2,3-dihydro-1*H*,5*H*-pyrido[3,2,1-*ij*]quinoline-6-carboxamido)methyl)phenyl)acetate (**24**)**

A 100mL roundbottom flask was charged with **14** (503mg, 1.94mmol). Added were EtOAc (19mL), followed by a stirbar and triethylamine (292 $\mu$ L, 2.14mmol, 1.1eq.). A mixture consisting of 3-(methoxycarbonylmethyl)benzylamine hydrochloride (1.26g, 5.8mmol, 3.0eq.) and EtOAc (6mL) was added and finally, T3P-solution ( $\geq 50\%$ w/w in EtOAc, 2.3mL, 3.88mmol, 2.0eq.) was added via syringe. The resulting solution was stirred at room temperature over night. The resulting suspension was diluted with EtOAc (25mL), washed with water (25mL), and concentrated to dryness. The residue was taken up in DMF (10mL) and dropwise, 0.1M HCl (10mL) was added to force the precipitation of product. The resulting suspension was cooled on ice for one hour, the solids were filtered and dried in vacuo overnight to yield **24** in 61% yield (498mg) as an off-white solid. The material was used in the subsequent step without further purification. MS/ESI positive ionization:  $m/z=421$  [M+H]<sup>+</sup>.

## 4.2 Ester hydrolysis

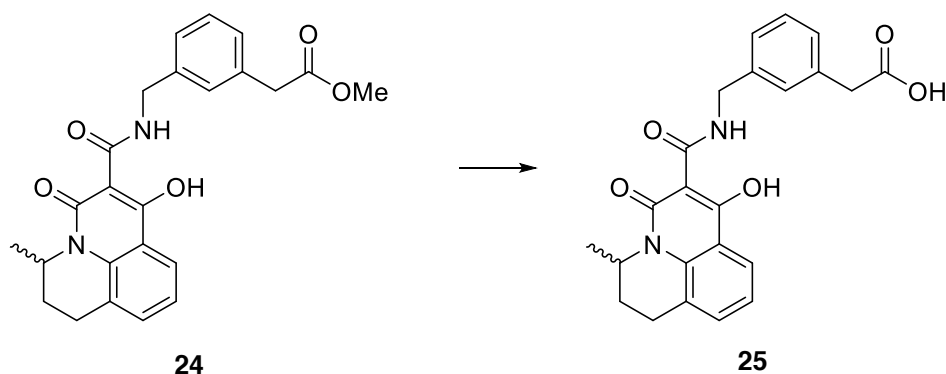

### 2-(3-((7-hydroxy-3-methyl-5-oxo-2,3-dihydro-1*H*,5*H*-pyrido[3,2,1-*ij*]quinoline-6-carboxamido)methyl)phenyl)acetic acid (**25**)

A 100mL roundbottom flask was charged with **24** (469mg, 1.11mmol) and MeCN was added (50 mL). The resulting solution was stirred at room temperature while 1M aq. NaOH (5mL) was added. The resulting mixture was stirred overnight, whereupon it was concentrated to approximately 10% of its initial volume in vacuo. Slowly and while stirring, 1M aq. HCl (10 mL)§ was added and the resulting aqueous phase was extracted with DCM (5 x 25 mL). The combined organic phases were dried over MgSO<sub>4</sub>, filtered and the solvent was removed in vacuo to yield **25** as a colorless foam in 89% yield (401mg). MS/ESI positive ionization:  $m/z=407$  [M+H]<sup>+</sup>.

## 4.3 Amide coupling with H<sub>2</sub>N-PEG<sub>6</sub>-TMP

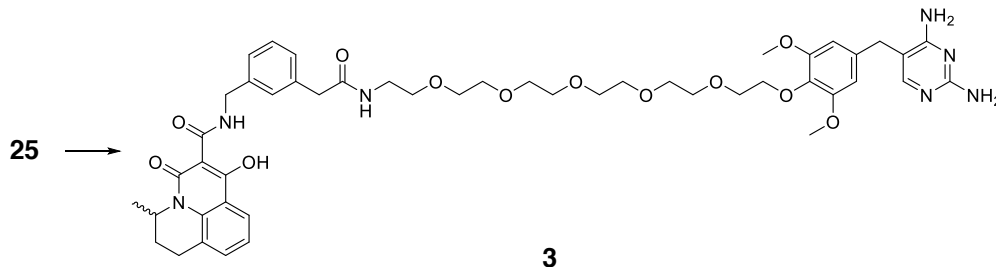

### *N*-(3-(20-(4-((2,4-diaminopyrimidin-5-yl)methyl)-2,6-dimethoxyphenoxy)-2-oxo-6,9,12,15,18-pentaoxa-3-azaicosyl)benzyl)-7-hydroxy-3-methyl-5-oxo-2,3-dihydro-1*H*,5*H*-pyrido[3,2,1-*ij*]quinoline-6-carboxamide (**3**)

Compound **25** (31mg, 0.08mmol, 1.0eq.) and H<sub>2</sub>N-PEG<sub>6</sub>-TMP (45mg, 0.08mmol, 1.1eq.) were weighed into a 4mL vial. DMF (0.75mL) and NEt<sub>3</sub> (43μL, 0.31mmol, 4.1eq.) were added and the resulting mixture was agitated to yield a solution. Using a micropipette, T3P-solution (≥50%w/w in EtOAc, 50μL, 0.17mmol, 2.2eq.) was added and the resulting solution was stirred overnight. A drop of MeOH was added to quench any T3P-residues, the solvent was removed by repeated coevaporation with toluene to yield a yellow gum, and the latter was dispersed over SiO<sub>2</sub> (approx. 0.7g). The SiO<sub>2</sub>-plug was washed with MeOH in DCM (0→3%) and the product was eluted by repeated washed with MeOH/DCM 1:1. The residue obtained after evaporation of the solvent was purified by preparative HPLC (30→50% MeCN in 50 mM aq. NH<sub>4</sub>HCO<sub>3</sub> over 10 minutes, XBridge C18 column) to yield **3** in 57% yield (40mg) as a yellow gum. Analysis by HPLC revealed, that the product was 97.3% pure. MS/ESI negative ionization:  $m/z=926$  [M-H]<sup>-</sup>.

#### 4.4 Chromatograms and mass-spectra of the final product

Detection using DAD at 305±90nm (top panel), 254±5nm (second panel from top) and 214±5nm (bottom panel). Third panel from top: TIC (see mass spectrum on next page).

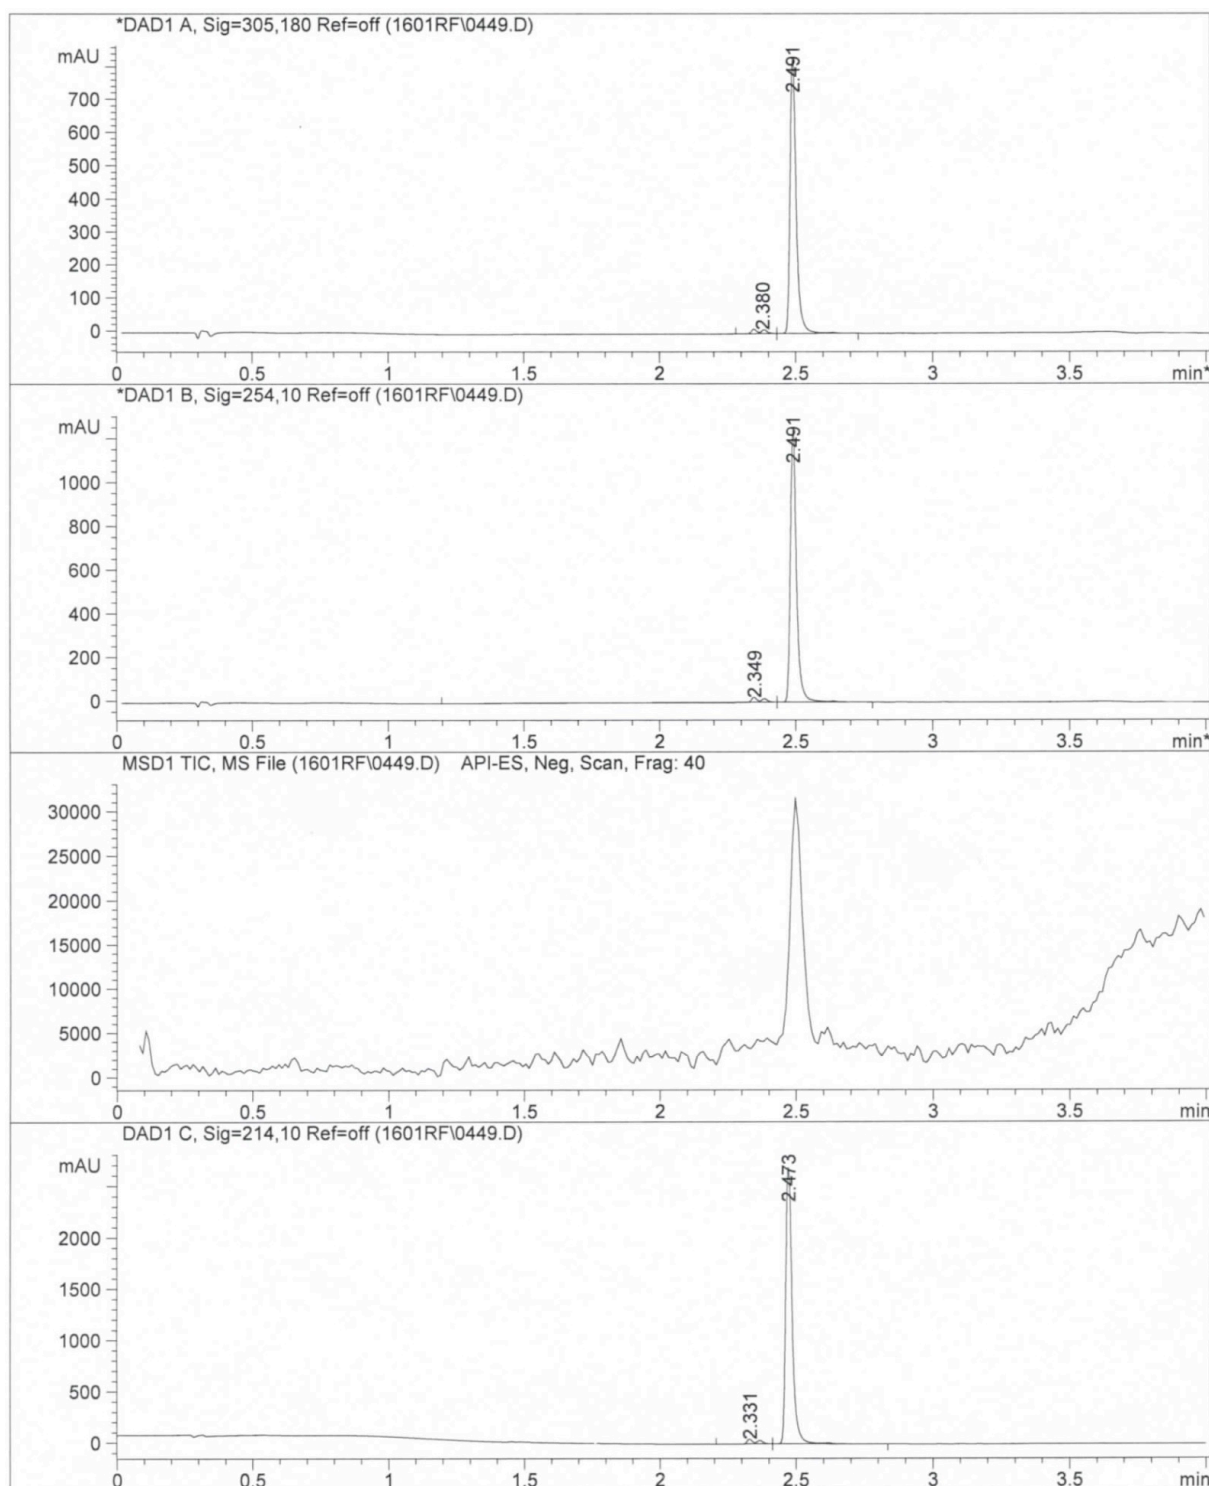

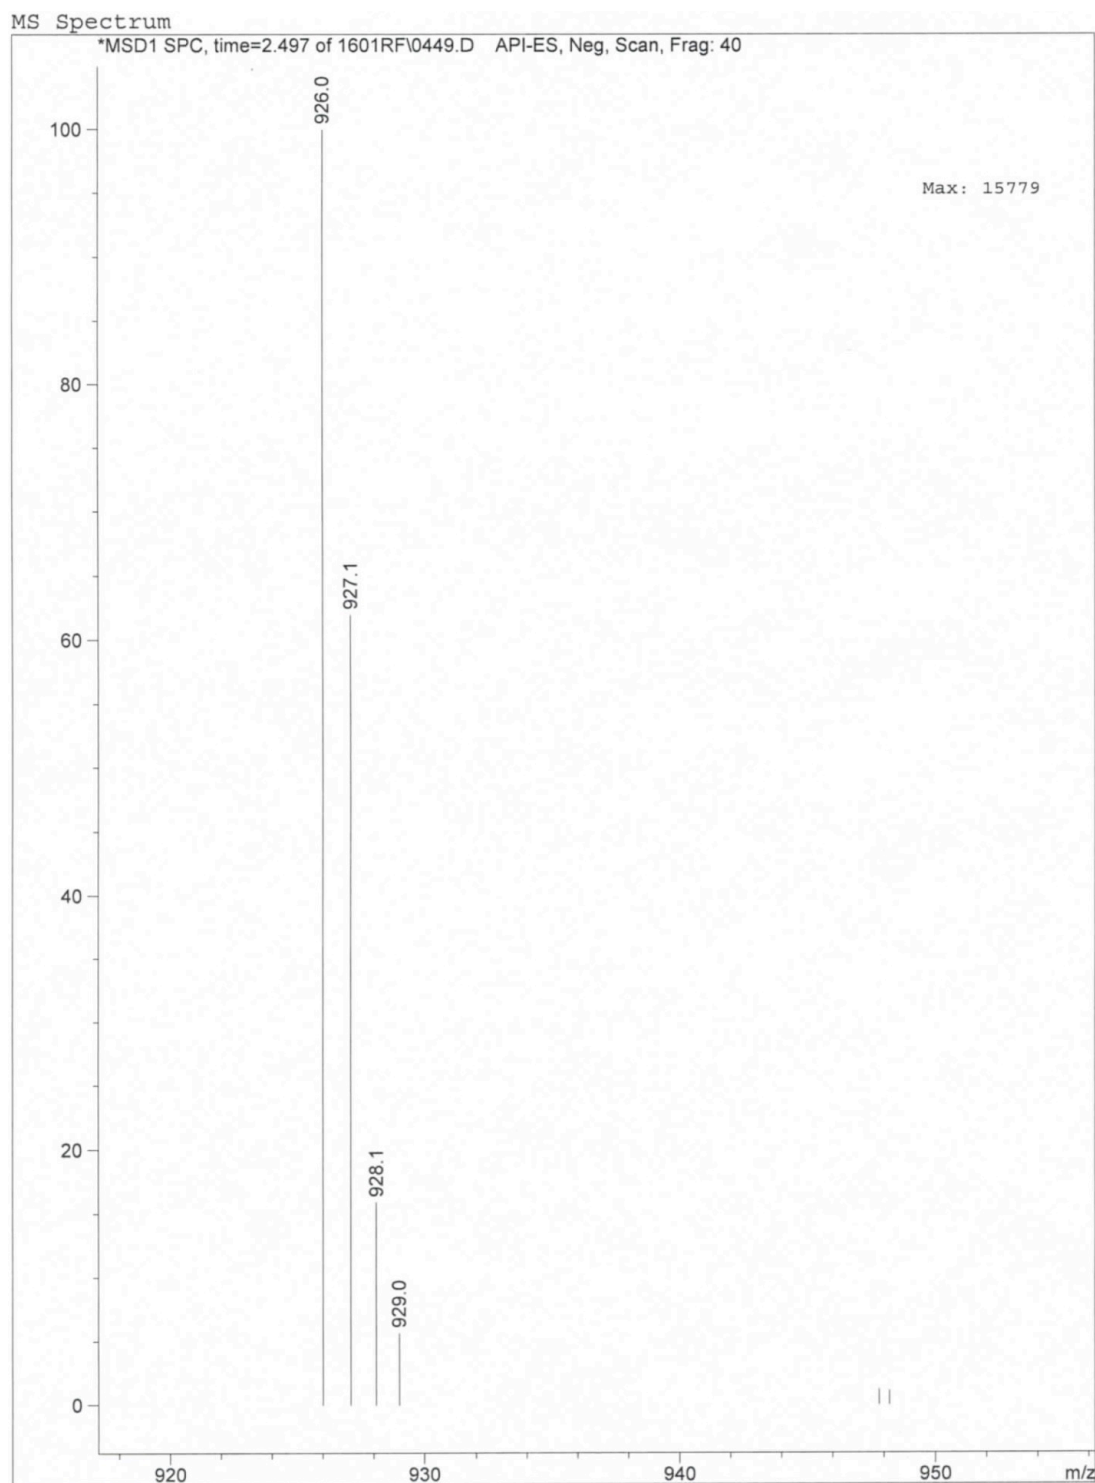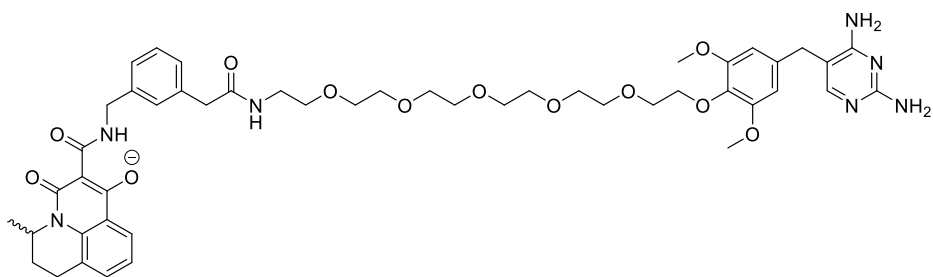

m/z (predicted): 926 (100.0%), 927 (51.9%), 928 (13.2%), 929 (2.6%), 929 (1.3%)

Date:  
2015-07-17

Batch: OLA3RWH6, -8  
Amount: 255.0 mg

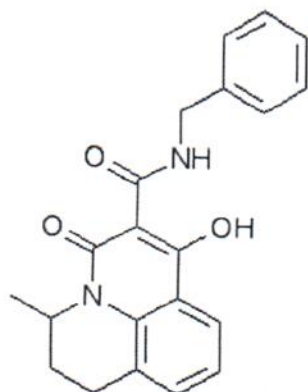

Compound: OLA3-f1

Molecular weight: 348.41 g/mol

Chemical formula: C<sub>21</sub>H<sub>20</sub>N<sub>2</sub>O<sub>3</sub>

Reference: *Chem. Heterocycl. Compd.*,  
2006, 42, 1208.

| Test/Method                                                                                                          | Specification        | Results                       |
|----------------------------------------------------------------------------------------------------------------------|----------------------|-------------------------------|
| Visual appearance                                                                                                    | -                    | White crystals                |
| HPLC purity acidic<br>ACE C8, CF <sub>3</sub> COOH (pH2), 3 min gradient,<br>UV detection at 254 nm                  | >95%                 | >99.9%                        |
| HPLC purity basic<br>XBridge C18, NH <sub>4</sub> HCO <sub>3</sub> (pH10), 3 min<br>gradient, UV detection at 254 nm |                      | >99.9%                        |
| MS / ESI, positive ionization                                                                                        | Confirms sum formula | [M+H] <sup>+</sup> = 349, 350 |
| <sup>1</sup> H NMR, 400 MHz, CDCl <sub>3</sub>                                                                       | Confirms structure   | Confirms structure            |

Responsible for synthesis:



..... Rafael Hartmann, M.Sc.

Analytical Review:

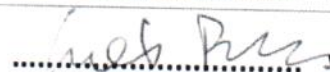

..... Wei Berts, Ph.D.

OnTarget Chemistry AB  
Virdings allé 32b  
75450 Uppsala  
Telefon: +46(0)76-614 8739

Org.nr: 556761-5439

E-post:  
info@ontargetchemistry.com  
Webb:  
www.ontargetchemistry.com

# CSIR

All files:  
OLA3RW\H6\_PROTON\_W\01.fid

Active data:  
SAMPLE  
date: Jul  
solvent: cdc13  
file: /home/walkup/ymmsys/Automation/  
auto\_20150716\_01/enkerfj.macdir/loc6\_003/current

ACQUISITION  
sw: 6397.95265515  
at: 2.5608192  
np: 32768  
fb: 3600  
bs: 4  
ss: 2  
d1: 4  
d2: 0  
nc: 32  
ct: 32

TRANSMITTER  
tx: H1  
slrq: 399.857922554  
lrf: 450.07115298  
pwr: 60  
pwr: 5.45

pl: 0  
DECOUPLER  
dn: C13  
dof: 0  
dnt: rnm  
decwave: 9  
dpmr: 49  
dmf: 18500

PRESATURATION  
satmode: n  
wet: n  
SPECIAL  
temp: 25  
gain: 30  
spin: 20  
hst: 0.00800000037998  
pw90: 10.9  
alt: 10  
FLAGS

ft: n  
in: n  
dp: y

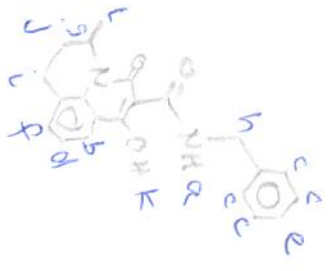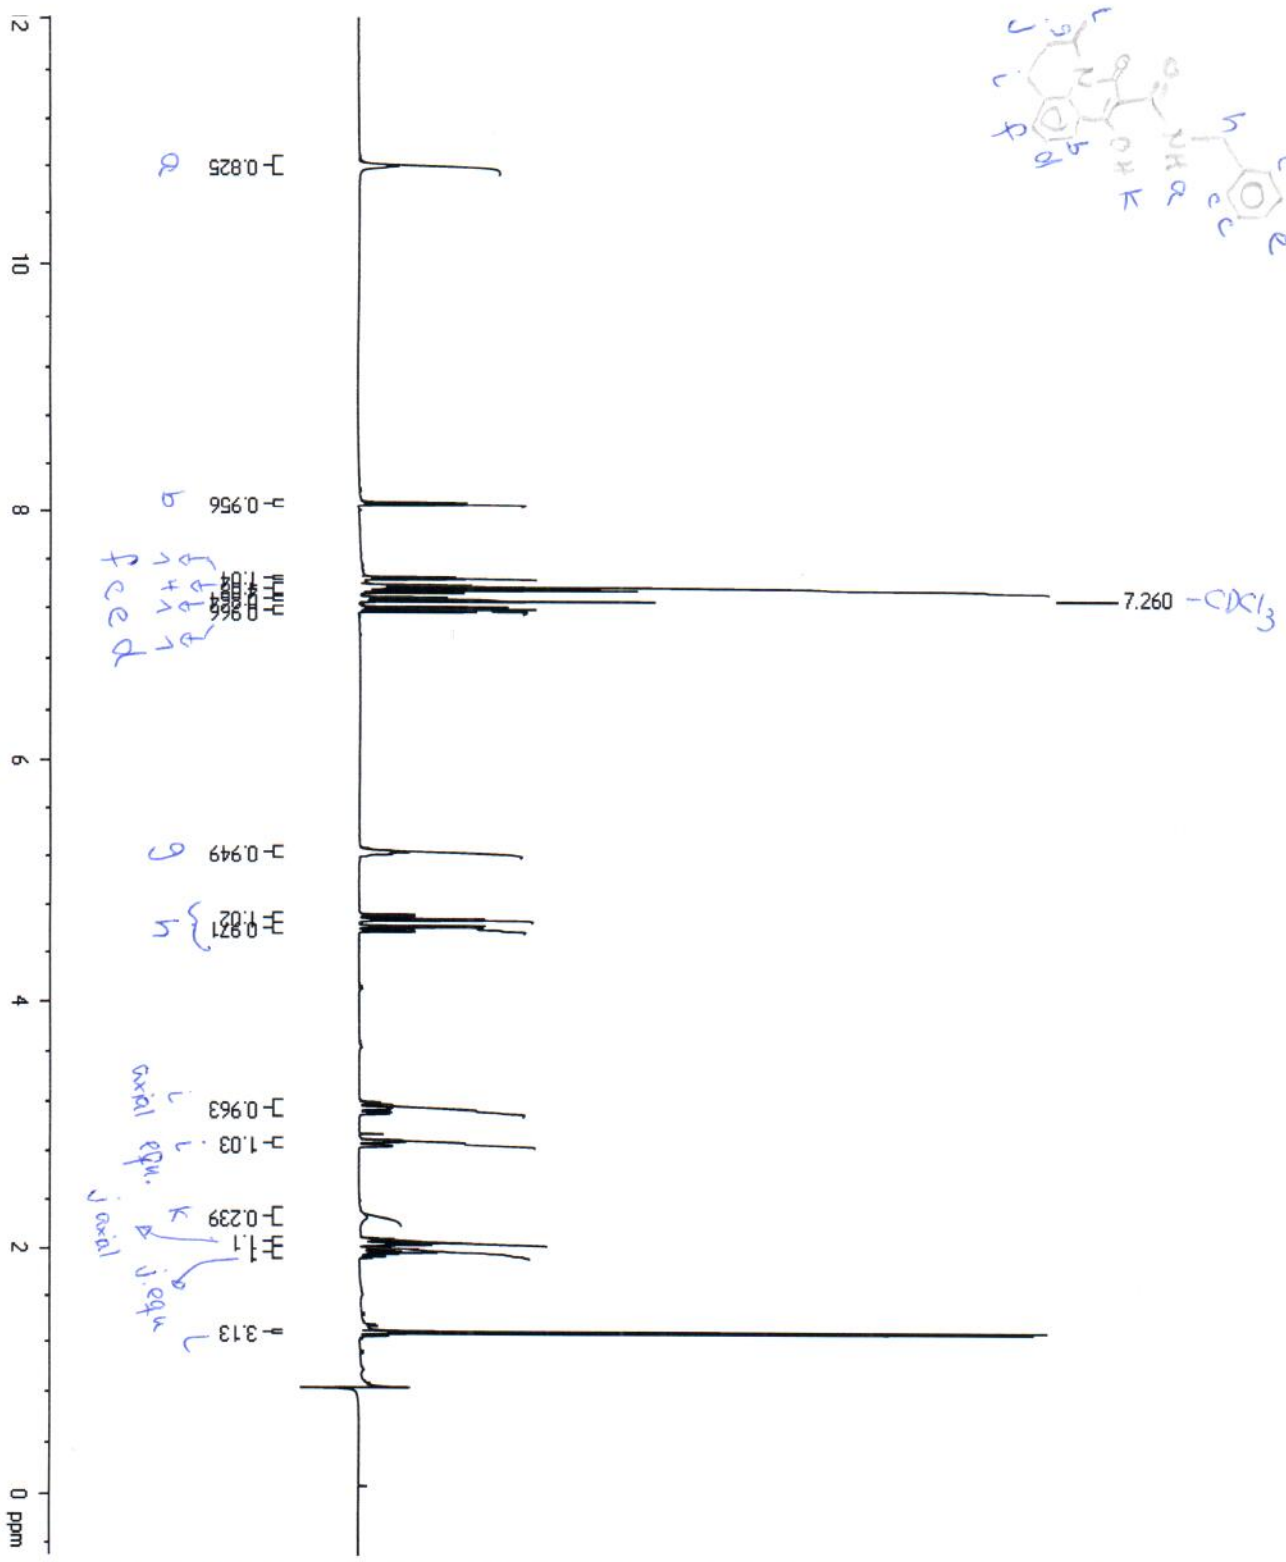



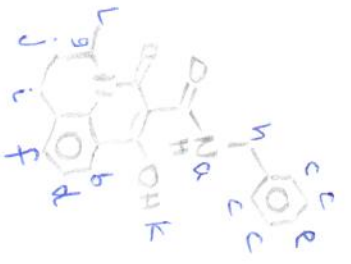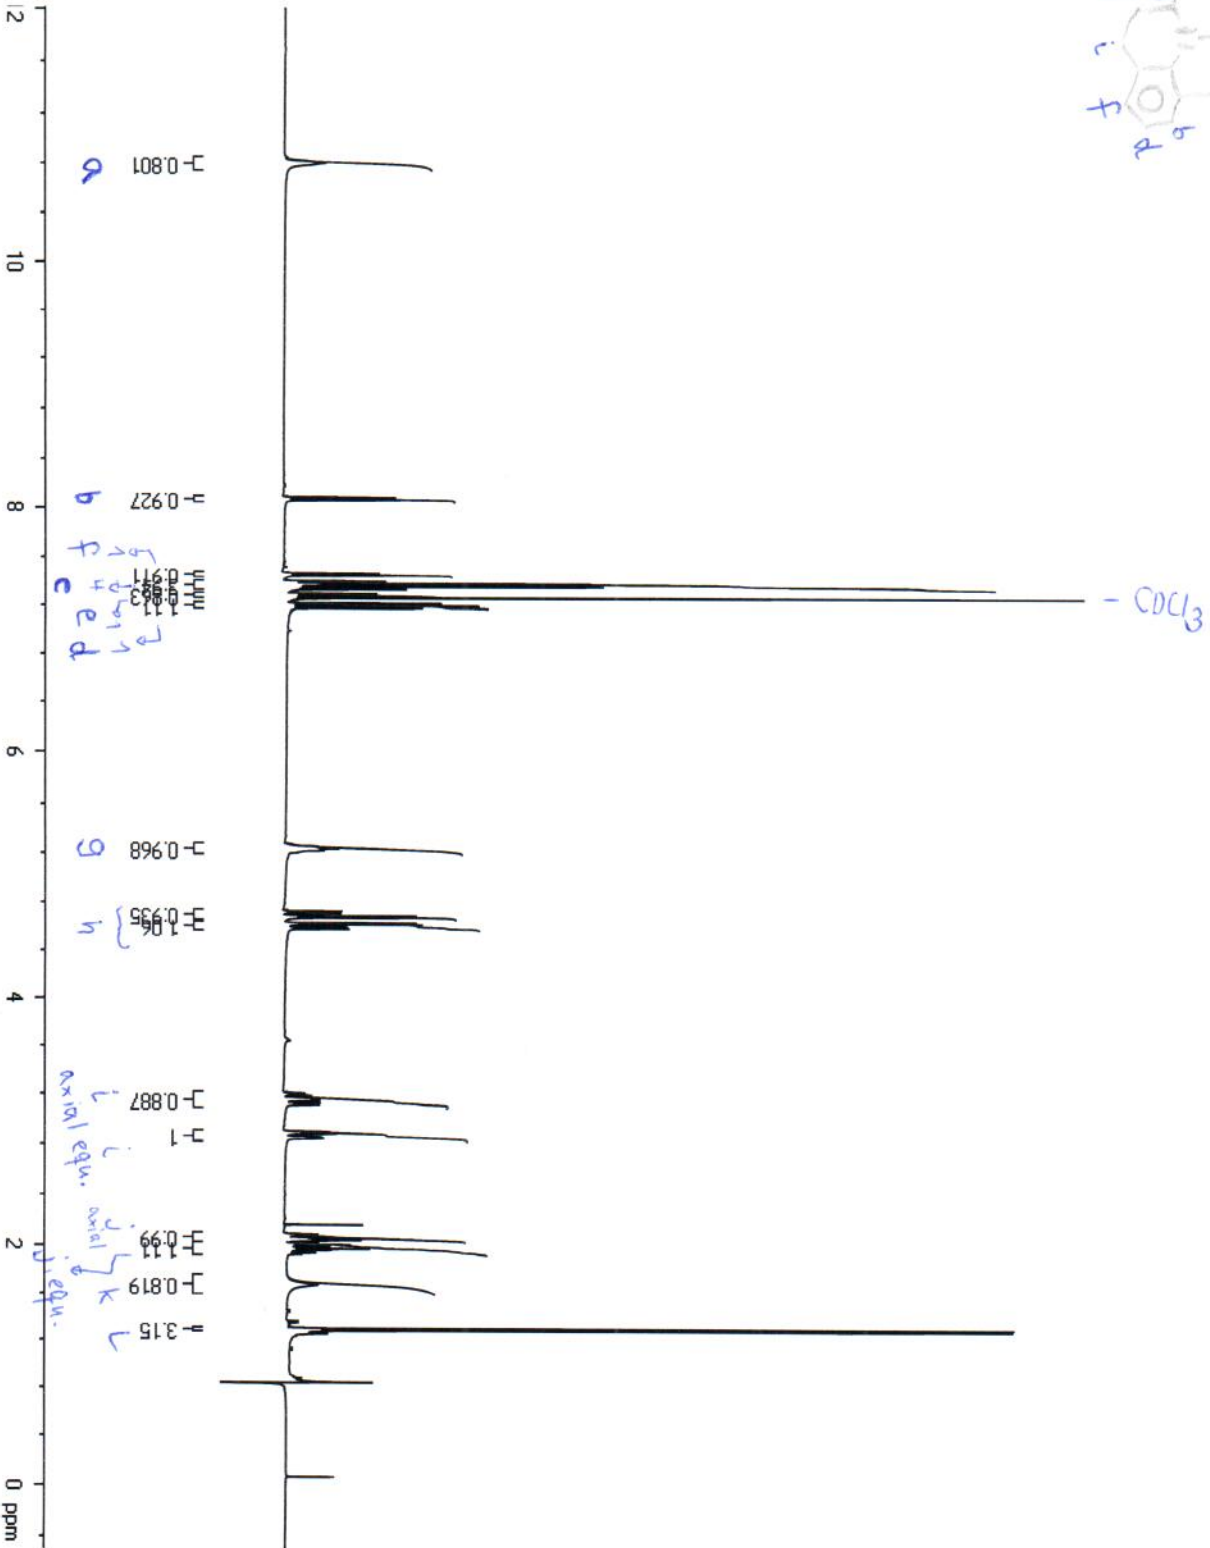

**CSim**

All files:  
OLA3RWH8

Active data:  
File: Z:/media/Server/Upptdaq/Diof A/0  
LA3 NMRs/OLA3RWH8  
Pulse program: s2pul  
Data type: spectrum (real)  
Number of points: 16384  
Spectrum width: 6397.95 Hz  
Applied processing:  
ft + agh + ph 148.081.108

=====  
Injection Date : 2015-07-17 08:23:33                      Seq. Line : 2  
Sample Name : OLA3-f1-purity                                Location : Vial 70  
Acq. Operator : Effie\_rf                                    Inj : 1  
Acq. Instrument : Instrument 1                              Inj Volume : Inj prog  
Sequence File : C:\HPCHEM\1\SEQUENCE\USETHIS.S  
Method : C:\HPCHEM\1\METHODS\STANDARD\SX1097X3.M  
Last changed : 2015-05-14 20:36:45 by Effie\_rf  
STANDARD METHOD FOR REGISTRATION INTO CHEMSPEC (2'nd)  
10-97% acetonitrile in 3 min, XTerra C18, 3.5u, 50x3.0, 1 ml/min, 215-395, 254 nm, A: 10mM  
NH4HCO3 (pHca10), B: MeCN  
=====

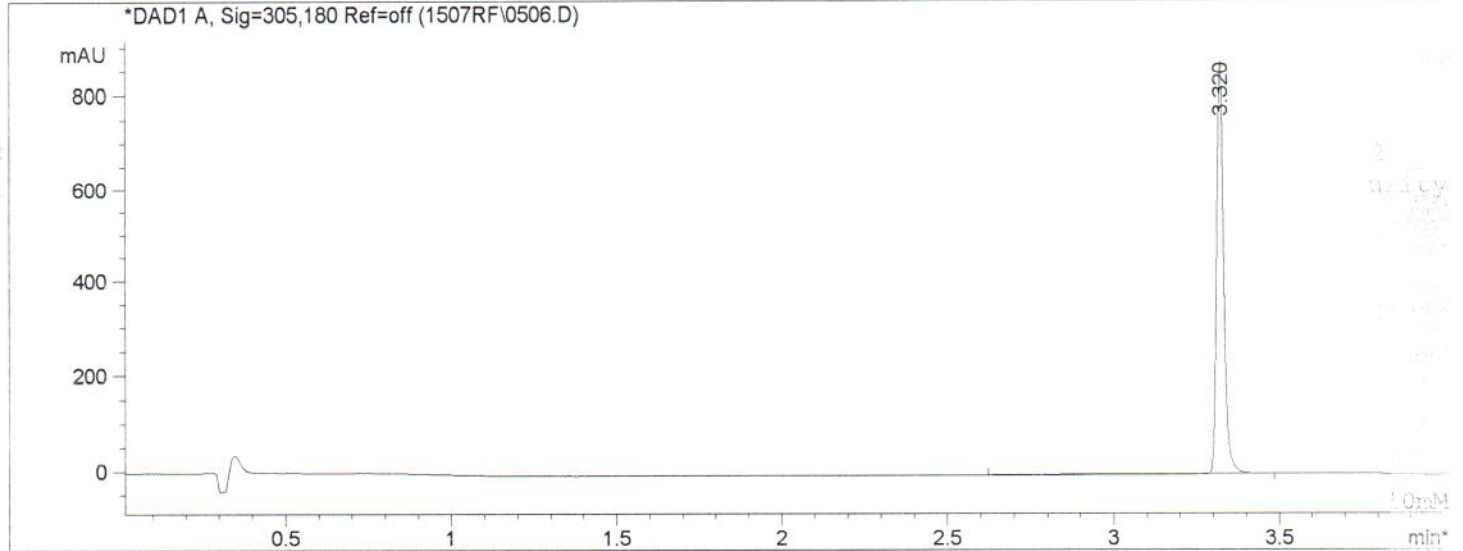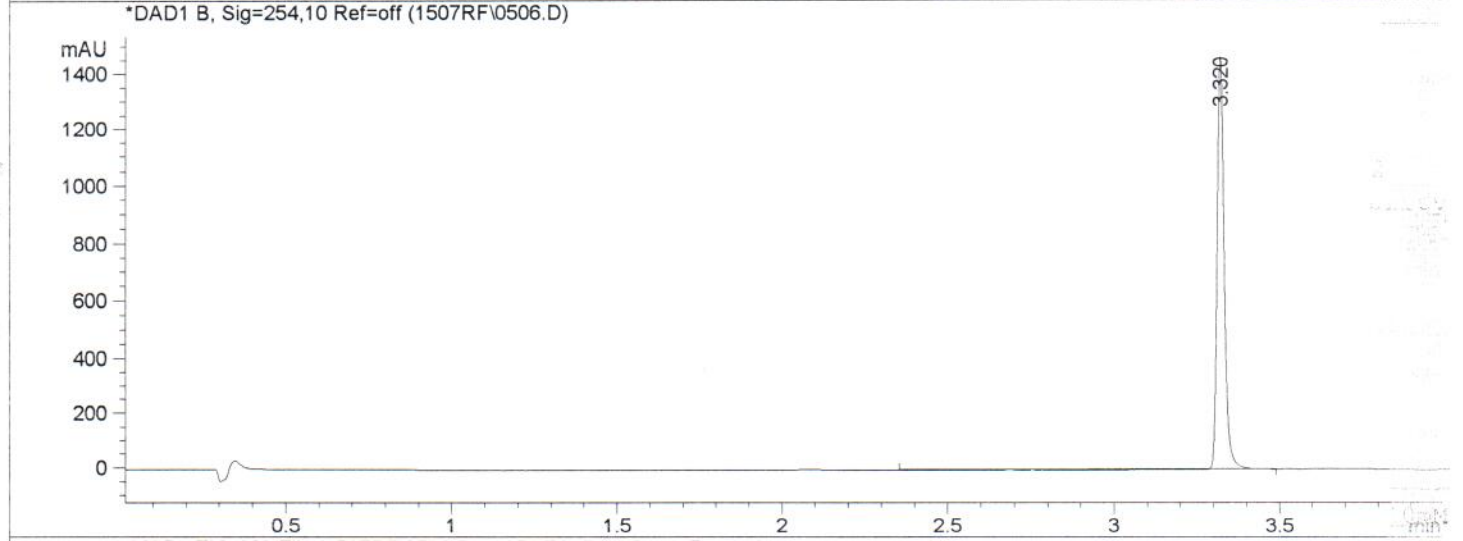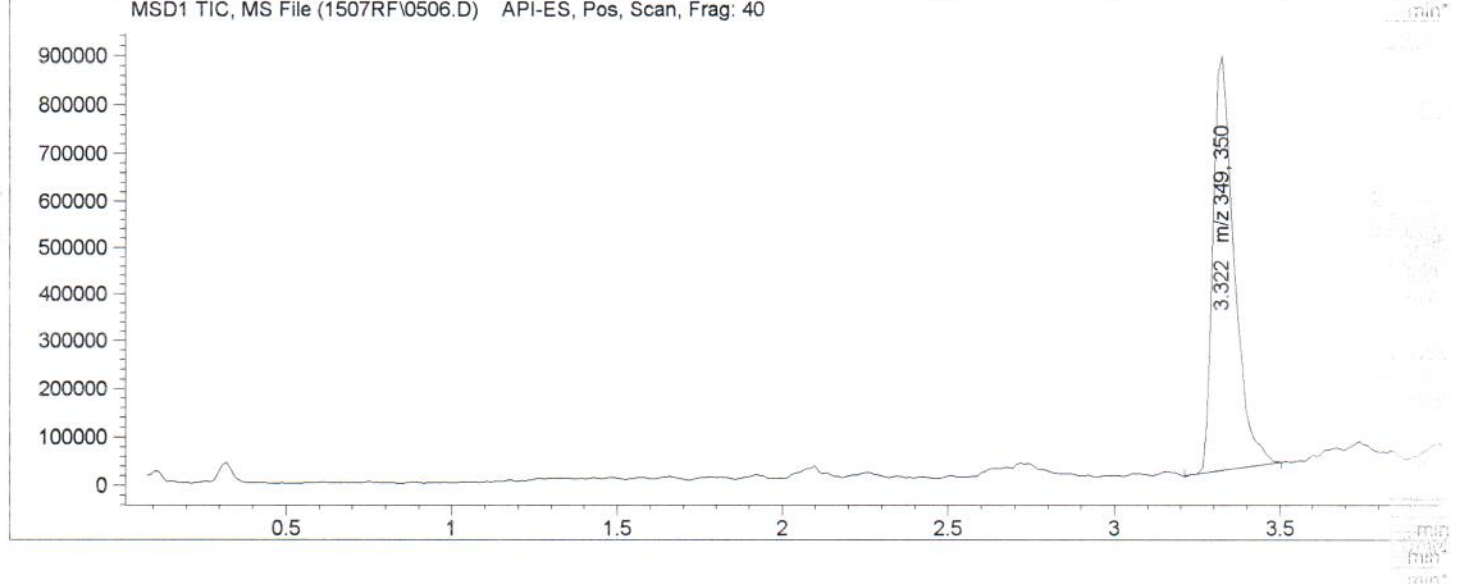

=====  
Area Percent Report  
=====

Sorted By : Signal  
Multiplier : 1.0000  
Dilution : 1.0000  
Use Multiplier & Dilution Factor with ISTDs

Signal 1: DAD1 A, Sig=305,180 Ref=off  
Signal has been modified after loading from rawdata file!

| Peak # | RetTime [min] | Type | Width [min] | Area [mAU*s] | Height [mAU] | Area %   |
|--------|---------------|------|-------------|--------------|--------------|----------|
| 1      | 3.320         | PB   | 0.0555      | 1266.83887   | 758.65112    | 100.0000 |

Totals : 1266.83887 758.65112

Signal 2: DAD1 B, Sig=254,10 Ref=off  
Signal has been modified after loading from rawdata file!

| Peak # | RetTime [min] | Type | Width [min] | Area [mAU*s] | Height [mAU] | Area %   |
|--------|---------------|------|-------------|--------------|--------------|----------|
| 1      | 3.320         | BBA  | 0.0638      | 2168.07495   | 1280.53235   | 100.0000 |

Totals : 2168.07495 1280.53235

Signal 3: MSD1 TIC, MS File

| Peak # | RetTime [min] | Type | Width [min] | Area      | Height    | Area %   |
|--------|---------------|------|-------------|-----------|-----------|----------|
| 1      | 3.322         | BB   | 0.0662      | 3.88909e6 | 8.75169e5 | 100.0000 |

Totals : 3.88909e6 8.75169e5

=====  
\*\*\* End of Report \*\*\*  
=====

Injection Date : 2015-07-17 08:16:56      Seq. Line : 1  
Sample Name : OLA3-f1-blank      Location : Vial 69  
Acq. Operator : Effie\_rf      Inj : 1  
Acq. Instrument : Instrument 1      Inj Volume : Inj prog  
Sequence File : C:\HPCHEM\1\SEQUENCE\USETHIS.S  
Method : C:\HPCHEM\1\METHODS\STANDARD\SX1097X3.M  
Last changed : 2015-05-14 20:36:45 by Effie\_rf  
STANDARD METHOD FOR REGISTRATION INTO CHEMSPEC (2'nd)  
10-97% acetonitrile in 3 min, XTerra C18, 3.5u, 50x3.0, 1 ml/min, 215-395, 254 nm, A: 10mM  
NH4HCO3(pHca10), B: MeCN

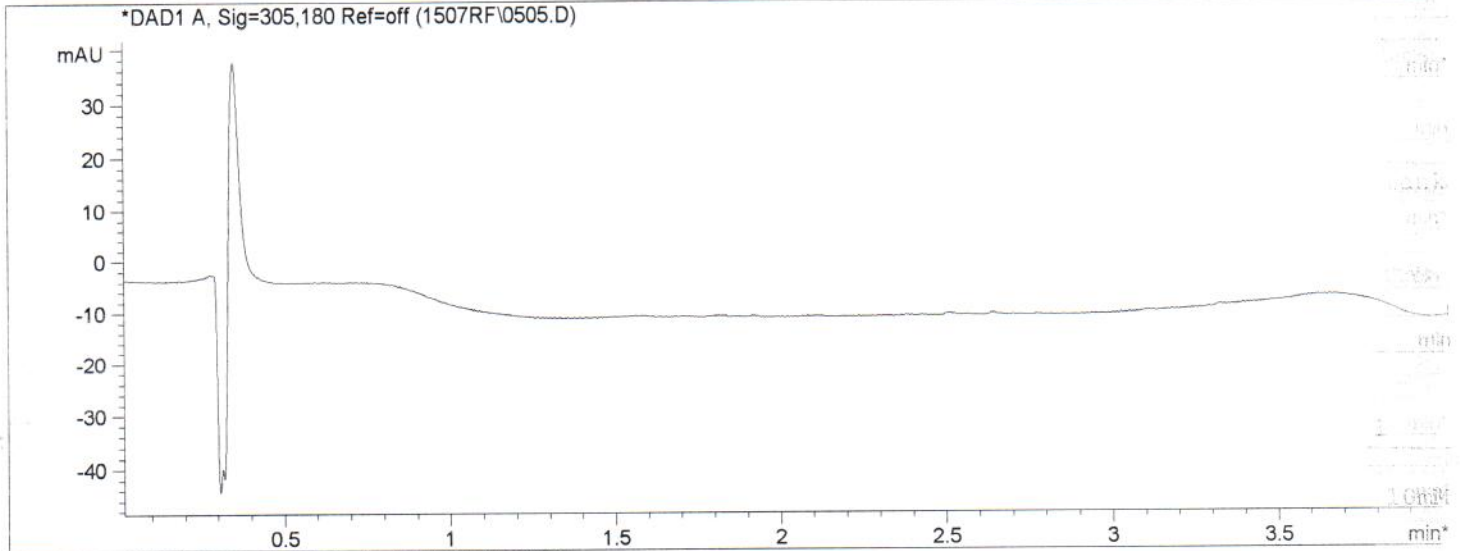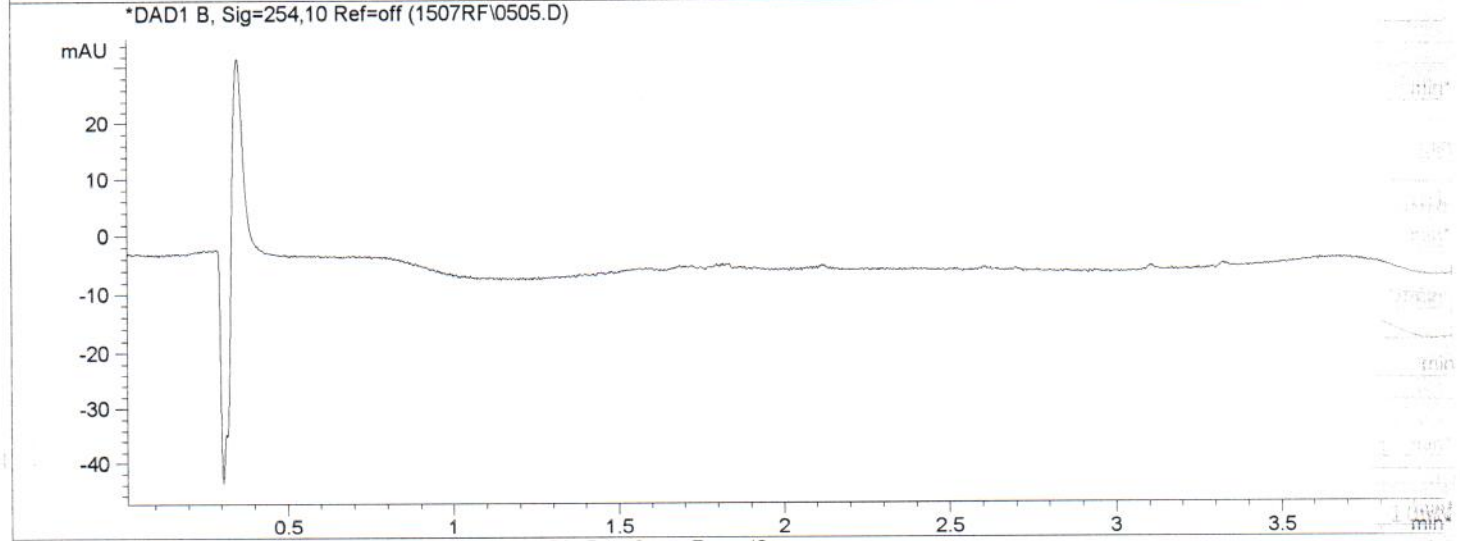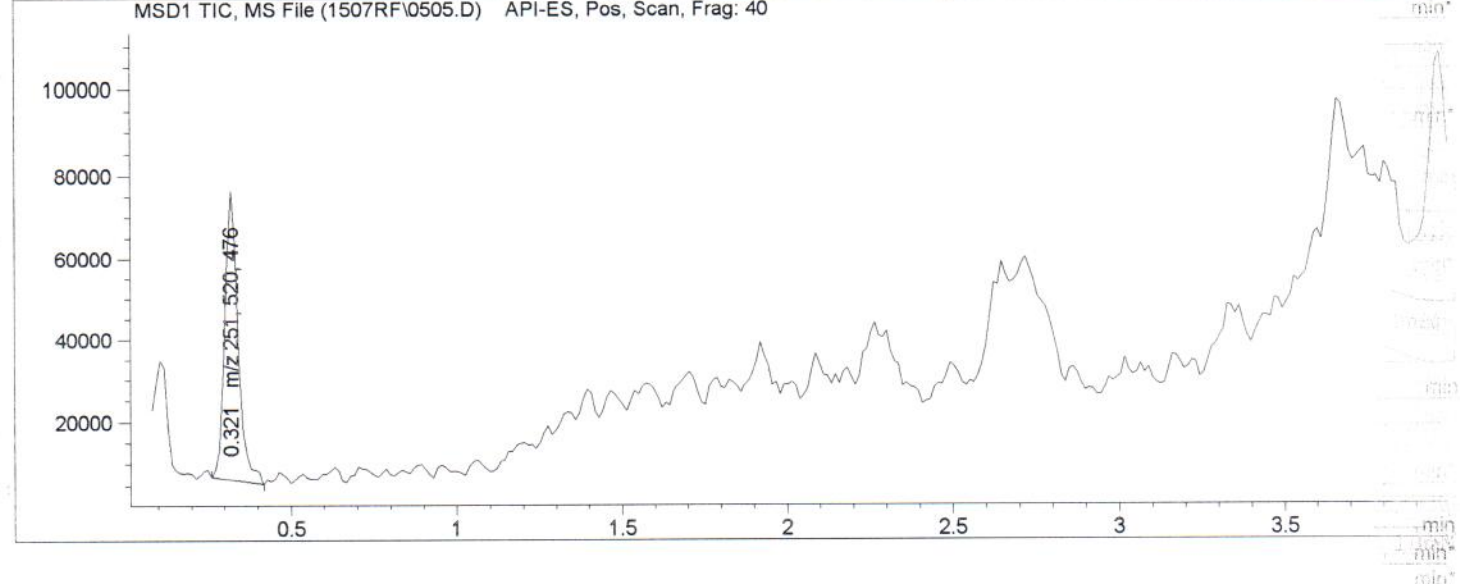

=====  
Area Percent Report  
=====

Sorted By : Signal  
Multiplier : 1.0000  
Dilution : 1.0000  
Use Multiplier & Dilution Factor with ISTDs

Signal 1: DAD1 A, Sig=305,180 Ref=off  
Signal has been modified after loading from rawdata file!

Signal 2: DAD1 B, Sig=254,10 Ref=off  
Signal has been modified after loading from rawdata file!

Signal 3: MSD1 TIC, MS File

| Peak # | RetTime [min] | Type | Width [min] | Area      | Height    | Area %   |
|--------|---------------|------|-------------|-----------|-----------|----------|
| 1      | 0.321         | BB   | 0.0427      | 1.92084e5 | 7.00760e4 | 100.0000 |

Totals : 1.92084e5 7.00760e4

=====  
\*\*\* End of Report \*\*\*

=====  
Injection Date : 2015-07-17 08:46:46                   Seq. Line : 2  
Sample Name : OLA3-f1-purity                            Location : Vial 70  
Acq. Operator : Effie\_rf                                Inj : 1  
Acq. Instrument : Instrument 1                         Inj Volume : Inj prog  
Sequence File : C:\HPCHEM\1\SEQUENCE\USETHIS.S  
Method : C:\HPCHEM\1\METHODS\STANDARD\ST1097A3.M  
Last changed : 2015-06-01 09:19:34 by Effie\_rf  
STANDARD METHOD FOR REGISTRATION INTO CHEMSPEC  
ACE 3 C8 50x3.0 mm, 10-97% acetonitrile in 3 min, 1 ml/min  
215-395 & 254 nm

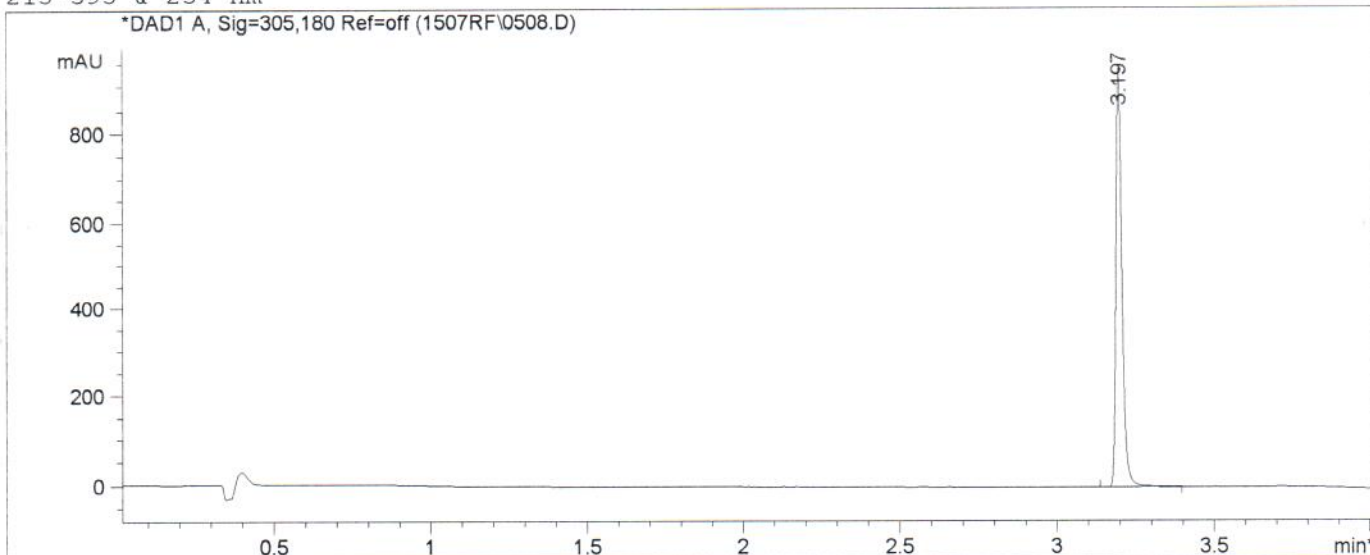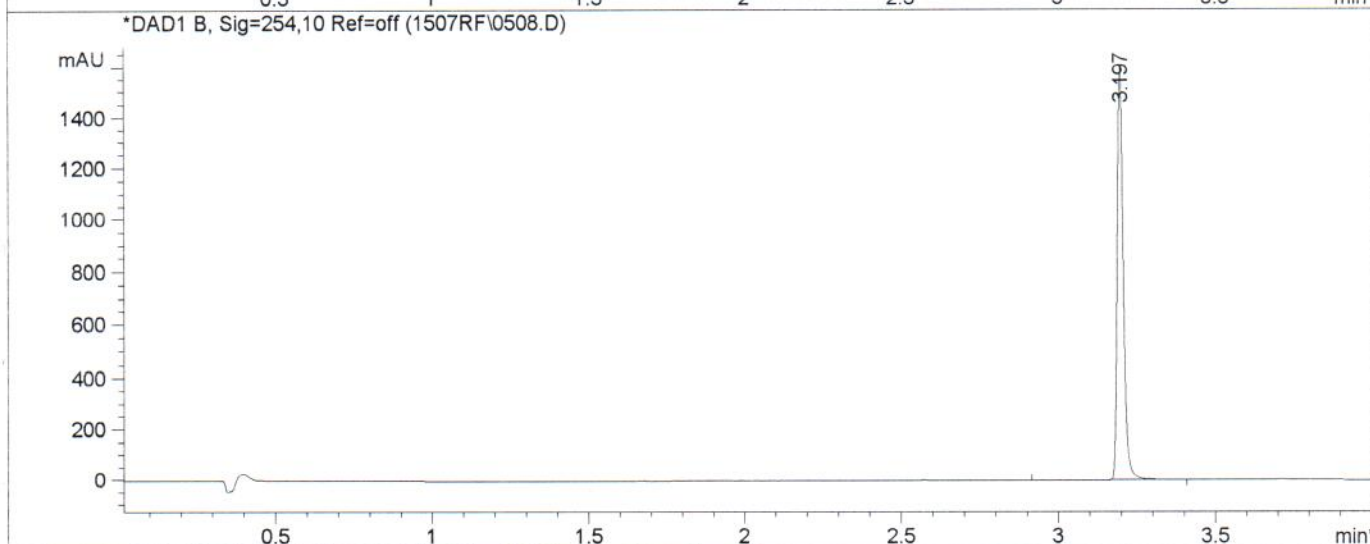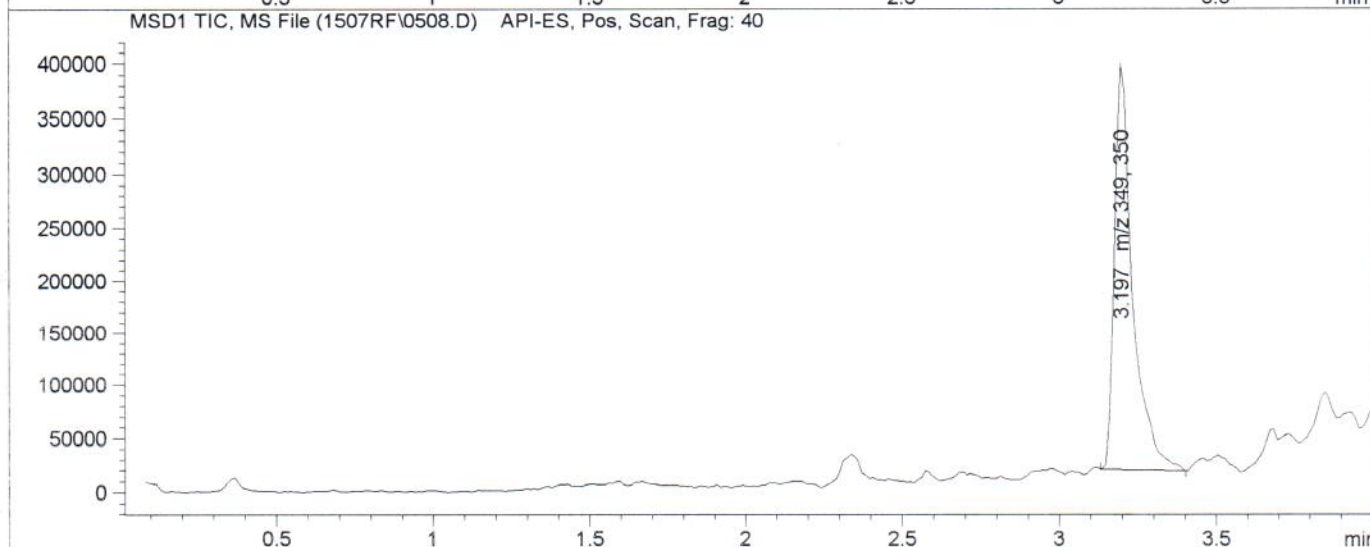

=====  
Area Percent Report  
=====

Sorted By : Signal  
Multiplier : 1.0000  
Dilution : 1.0000  
Use Multiplier & Dilution Factor with ISTDs

Signal 1: DAD1 A, Sig=305,180 Ref=off  
Signal has been modified after loading from rawdata file!

| Peak # | RetTime [min] | Type | Width [min] | Area [mAU*s] | Height [mAU] | Area %   |
|--------|---------------|------|-------------|--------------|--------------|----------|
| 1      | 3.197         | PBA  | 0.0293      | 1275.48010   | 858.55267    | 100.0000 |

Totals : 1275.48010 858.55267

Signal 2: DAD1 B, Sig=254,10 Ref=off  
Signal has been modified after loading from rawdata file!

| Peak # | RetTime [min] | Type | Width [min] | Area [mAU*s] | Height [mAU] | Area %   |
|--------|---------------|------|-------------|--------------|--------------|----------|
| 1      | 3.197         | BBA  | 0.0295      | 2182.70093   | 1455.14075   | 100.0000 |

Totals : 2182.70093 1455.14075

Signal 3: MSD1 TIC, MS File

| Peak # | RetTime [min] | Type | Width [min] | Area      | Height    | Area %   |
|--------|---------------|------|-------------|-----------|-----------|----------|
| 1      | 3.197         | BB   | 0.0573      | 1.52962e6 | 3.82860e5 | 100.0000 |

Totals : 1.52962e6 3.82860e5

=====  
\*\*\* End of Report \*\*\*

=====  
Injection Date : 2015-07-17 08:39:54                      Seq. Line : 1  
Sample Name : OLA3-f1-blank                                Location : Vial 69  
Acq. Operator : Effie\_rf                                    Inj : 1  
Acq. Instrument : Instrument 1                            Inj Volume : Inj prog  
Sequence File : C:\HPCHEM\1\SEQUENCE\USETHIS.S  
Method : C:\HPCHEM\1\METHODS\STANDARD\ST1097A3.M  
Last changed : 2015-06-01 09:19:34 by Effie\_rf  
STANDARD METHOD FOR REGISTRATION INTO CHEMSPEC  
ACE 3 C8 50x3.0 mm, 10-97% acetonitrile in 3 min, 1 ml/min  
215-395 & 254 nm

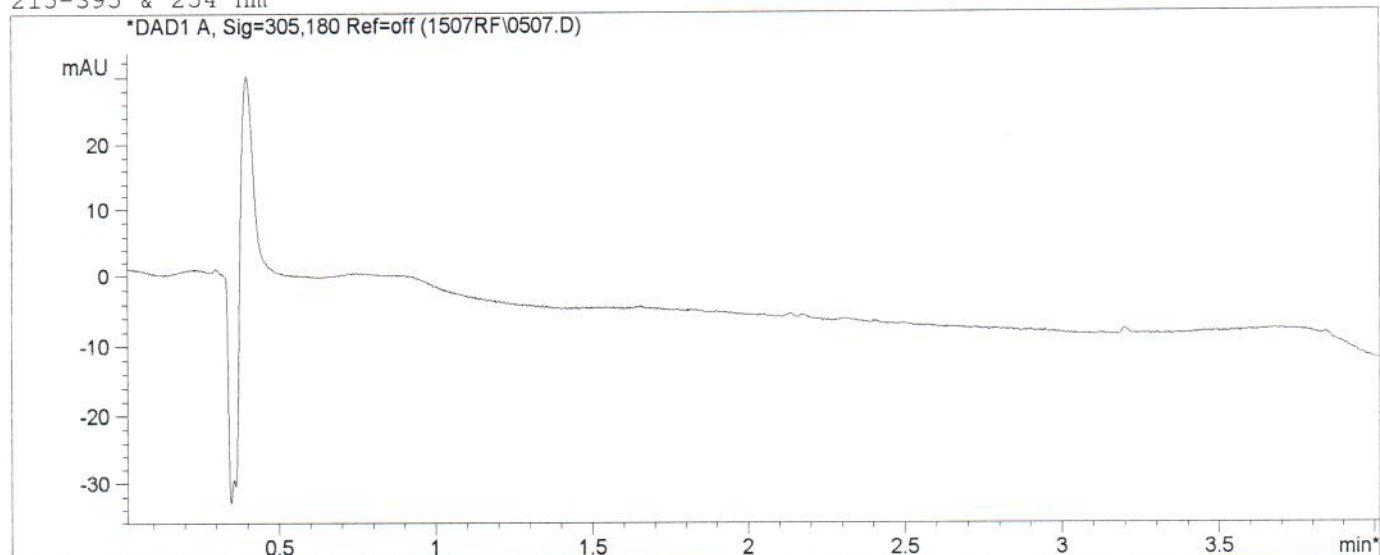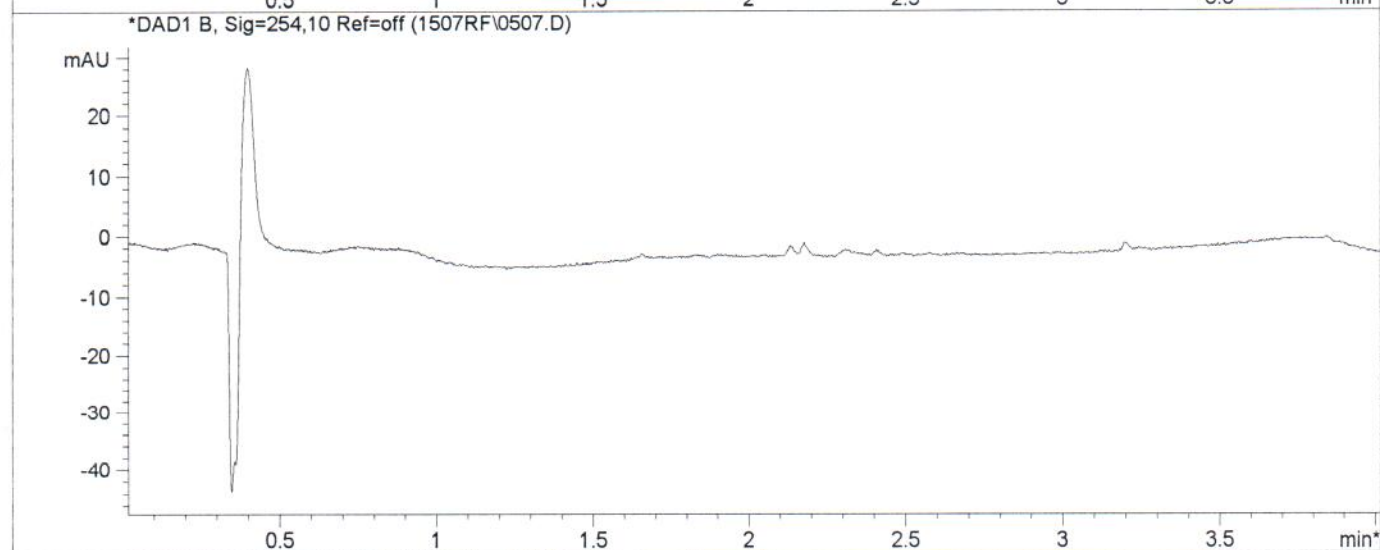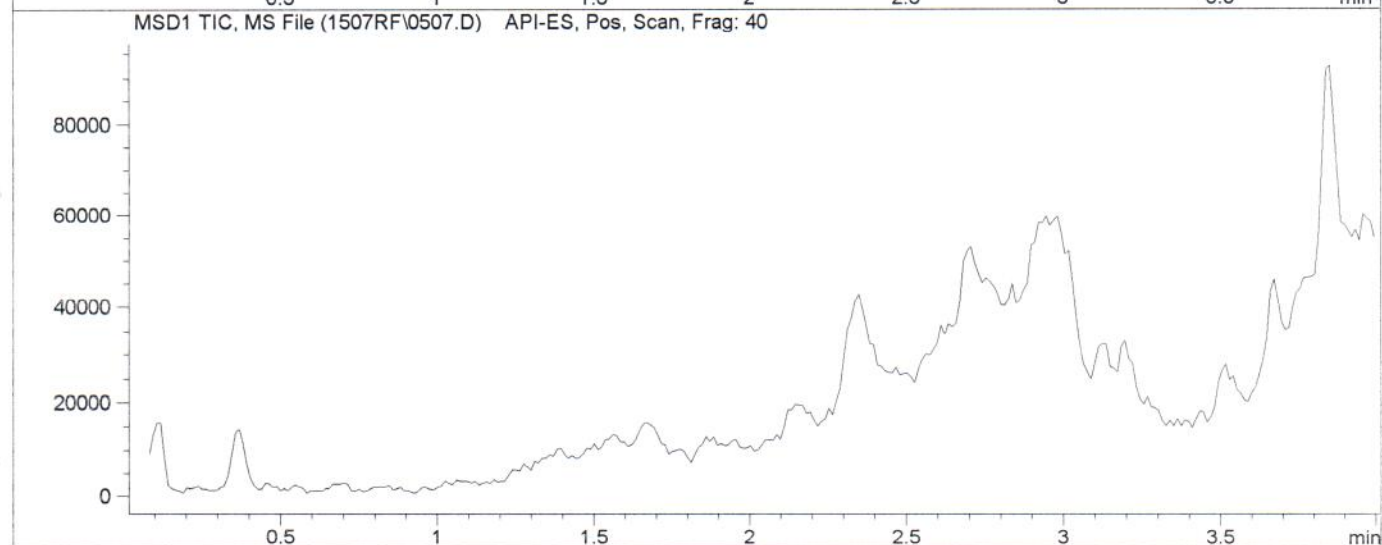



=====  
Area Percent Report  
=====

Sorted By : Signal  
Multiplier : 1.0000  
Dilution : 1.0000  
Use Multiplier & Dilution Factor with ISTDs

No peaks found

=====  
\*\*\* End of Report \*\*\*

Inst

Date

Time

Inst

Date

Inst

Date

Time

Inst

Date

Time

Inst

Date

Time

Inst

### Results Summary

## YChemH SCREEN TMP-PEG5 - OCT140805 / HBX129659 vs Human Islets Langerhans\_RP1

Mon, Nov 21, 2016 - 04:31 PM

### Screen Parameters

|                       |                                              |
|-----------------------|----------------------------------------------|
| Nature                | cDNA                                         |
| Reference Bait        | TMP-PEG5 - OCT140805 / HBX129659 ; hgx4366v1 |
| Prey Library          | Human Islets Langerhans_RP1                  |
| Vector(s)             | pB409 (N-LexA-eDHFR-C)                       |
| Processed Clones      | 76 (pB409_A)                                 |
| Analyzed Interactions | 135 millions (pB409_A)                       |
| 3AT Concentration     | 0.0 mM (pB409_A)                             |

### Global PBS®

| Global PBS (for Interactions represented in the Screen) |                                                                                                                                                                                                                                                                                                                                                                                                                  | Nb | %     |
|---------------------------------------------------------|------------------------------------------------------------------------------------------------------------------------------------------------------------------------------------------------------------------------------------------------------------------------------------------------------------------------------------------------------------------------------------------------------------------|----|-------|
| <b>A</b>                                                | Very high confidence in the interaction                                                                                                                                                                                                                                                                                                                                                                          | 1  | 3.8%  |
| <b>B</b>                                                | High confidence in the interaction                                                                                                                                                                                                                                                                                                                                                                               | 5  | 19.2% |
| <b>C</b>                                                | Good confidence in the interaction                                                                                                                                                                                                                                                                                                                                                                               | 1  | 3.8%  |
| <b>D</b>                                                | Moderate confidence in the interaction<br>This category is the most difficult to interpret because it mixes two classes of interactions :<br>- False-positive interactions<br>- Interactions hardly detectable by the Y2H technique (low representation of the mRNA in the library, prey folding, prey toxicity in yeast)                                                                                        | 15 | 57.7% |
| <b>E</b>                                                | Interactions involving highly connected prey domains, warning of non-specific interaction. The threshold for high connectivity is 6. They can be classified in different categories:<br>- Prey proteins that are known to be highly connected due to their biological function<br>- Proteins with a prey interacting domain that contains a known protein interaction motif or a biochemically promiscuous motif | 4  | 15.4% |
| <b>F</b>                                                | Experimentally proven technical artifacts                                                                                                                                                                                                                                                                                                                                                                        | 0  | 0.0%  |
| <b>Non Applicable</b>                                   |                                                                                                                                                                                                                                                                                                                                                                                                                  |    |       |
| N/A                                                     | The PBS is a score that is automatically computed through algorithms and cannot be attributed for the following reasons :<br>- All the fragments of the same reference CDS are antisense<br>- The 5p sequence is missing<br>- All the fragments of the same reference CDS are either all OOF1 or all OOF2<br>- All the fragments of the same reference CDS lie in the 5' or 3' UTR                               |    |       |

## Prey Fragment Analysis

| Symbols            | Means                                                                                                                                                                                                                                                                                                                                                                                                                                                                                   |
|--------------------|-----------------------------------------------------------------------------------------------------------------------------------------------------------------------------------------------------------------------------------------------------------------------------------------------------------------------------------------------------------------------------------------------------------------------------------------------------------------------------------------|
| ✱                  | The fragment contains the full length CDS                                                                                                                                                                                                                                                                                                                                                                                                                                               |
| ↳                  | Fragment is fully in 5' UTR                                                                                                                                                                                                                                                                                                                                                                                                                                                             |
| ↶                  | Fragment is fully in 3' UTR                                                                                                                                                                                                                                                                                                                                                                                                                                                             |
| ✘                  | Fragment contains at least one In Frame STOP codon                                                                                                                                                                                                                                                                                                                                                                                                                                      |
| [NR]               | Fragment was found to be non relevant (poor quality, high N density)                                                                                                                                                                                                                                                                                                                                                                                                                    |
| IF<br>OOF1<br>OOF2 | With regard to the theoretical frame of each corresponding CDS (GeneBank), fragments are cloned in frame (IF) if they are in the same frame as Gal4AD. In general, polypeptides synthesized from OOF fragments are not considered of biological interest, unless found together with another frame. However, some of the proteins expressed from an OOF fragment can be translated in the correct frame, due to the existence of natural frame-shift events during translation in yeast |
| ??                 | Unidentified frame when :<br>- The clone sequence is antisense<br>- The 5p sequence is missing                                                                                                                                                                                                                                                                                                                                                                                          |
| N                  | Antisense                                                                                                                                                                                                                                                                                                                                                                                                                                                                               |
| Start...Stop       | Position of the 5p and 3p prey fragment ends, relative to the position of the ATG start codon (A=0)                                                                                                                                                                                                                                                                                                                                                                                     |

| Clone Name  | Type Seq | Gene Name (Best Match)                    | Start..Stop (nt) | Frame | Sense | %Id 5p | %Id 3p | PBS |
|-------------|----------|-------------------------------------------|------------------|-------|-------|--------|--------|-----|
| pB409_A-163 | 5p/3p    | <a href="#">Homo sapiens - ALDH3A2</a>    | -161..1362       | OOF2  |       | 94.6   | 98.1   | B   |
| pB409_A-3   | 5p/3p    | <a href="#">Homo sapiens - ALDH3A2</a>    | -160..1362       | IF    |       | 97.3   | 98.9   | B   |
| pB409_A-41  | 5p/3p    | <a href="#">Homo sapiens - ALDH3A2</a>    | -160..1362       | IF    |       | 99.1   | 98.4   | B   |
| pB409_A-187 | 5p/3p    | <a href="#">Homo sapiens - ALDH3A2</a>    | -160..1362       | IF    |       | 97.6   | 94.5   | B   |
| pB409_A-6   | 5p/3p    | <a href="#">Homo sapiens - ALDH3A2</a>    | -160..1362       | IF    |       | 100.0  | 95.2   | B   |
| pB409_A-200 | 5p/3p    | <a href="#">Homo sapiens - ALDH3A2</a>    | -160..1362       | IF    |       | 92.9   | 94.7   | B   |
| pB409_A-80  | 5p/3p    | <a href="#">Homo sapiens - ALDH3A2</a>    | -160..1362       | IF    |       | 89.4   | 97.4   | B   |
| pB409_A-182 | 5p/3p    | <a href="#">Homo sapiens - ALDH3A2</a>    | -160..1362       | IF    |       | 97.1   | 88.5   | B   |
| pB409_A-2   | 5p/3p    | <a href="#">Homo sapiens - ALDH3A2</a>    | -160..1362       | IF    |       | 72.8   | 93.5   | B   |
| pB409_A-201 | 5p/3p    | <a href="#">Homo sapiens - ALDH3A2</a>    | -29..1384        | IF    |       | 99.9   | 97.9   | B   |
| pB409_A-90  | 5p/3p    | <a href="#">Homo sapiens - CBARA1</a>     | 114..1404        | IF    |       | 97.5   | 97.6   | D   |
| pB409_A-35  | 5p/3p    | <a href="#">Homo sapiens - CBARA1</a>     | 114..1404        | IF    |       | 99.2   | 97.8   | D   |
| pB409_A-106 | 5p/3p    | <a href="#">Homo sapiens - DNM1L var1</a> | -70..280         | IF    |       | 100.0  | 100.0  | D   |
| pB409_A-98  | 5p       | <a href="#">Homo sapiens - DNMT3A</a>     | 1887             | IF    |       | 97.4   |        | D   |
| pB409_A-49  | 5p/3p    | <a href="#">Homo sapiens - DOT1L</a>      | 3342..2915       | ??    | N     | 98.3   | 98.3   | N/A |
| pB409_A-149 | 5p/3p    | <a href="#">Homo sapiens - DZIP1</a>      | 1859..2471       | OOF2  |       | 99.5   | 99.5   | N/A |
| pB409_A-190 | 5p/3p    | <a href="#">Homo sapiens - EPS8L2</a>     | 135..1404        | IF    |       | 99.7   | 98.9   | D   |
| pB409_A-19  | 5p/3p    | <a href="#">Homo sapiens - FIZ1</a>       | 213..1654 ✘      | IF    |       | 93.9   | 95.3   | D   |
| pB409_A-136 | 5p/3p    | <a href="#">Homo sapiens - FN1</a>        | 5712..6196       | IF    |       | 100.0  | 100.0  | D   |
| pB409_A-162 | 5p/3p    | <a href="#">Homo sapiens - FN1</a>        | 5712..6196       | IF    |       | 99.8   | 100.0  | D   |
| pB409_A-24  | 5p/3p    | <a href="#">Homo sapiens - FN1</a>        | 5712..6196       | IF    |       | 100.0  | 100.0  | D   |

| Clone Name  | Type Seq | Gene Name (Best Match)                  | Start..Stop (nt) | Frame  | Sense | %Id 5p | %Id 3p | PBS |
|-------------|----------|-----------------------------------------|------------------|--------|-------|--------|--------|-----|
| pB409_A-160 | 5p/3p    | <a href="#">Homo sapiens - FN1</a>      | 5712..6196       | IF     |       | 99.8   | 100.0  | D   |
| pB409_A-38  | 5p       | <a href="#">Homo sapiens - HEY-L</a>    | 99..477          | IF     |       | 100.0  |        | E   |
| pB409_A-184 | 5p       | <a href="#">Homo sapiens - HLA-A</a>    | 481..382         | ??     | N     | 100.0  |        | N/A |
| pB409_A-129 | 5p/3p    | <a href="#">Homo sapiens - HMG20A</a>   | 21..594          | IF     |       | 99.7   | 100.0  | D   |
| pB409_A-66  | 5p/3p    | <a href="#">Homo sapiens - HNRNPUL1</a> | -97..1582        | IF     |       | 99.2   | 94.8   | B   |
| pB409_A-154 | 5p/3p    | <a href="#">Homo sapiens - HNRNPUL1</a> | 1518..2105       | IF     |       | 94.2   | 99.8   | B   |
| pB409_A-199 | 5p/3p    | <a href="#">Homo sapiens - HNRNPUL1</a> | 1530..2228       | IF     |       | 93.0   | 97.7   | B   |
| pB409_A-144 | 5p/3p    | <a href="#">Homo sapiens - HNRPU</a>    | 73..252          | OOF1   |       | 99.4   | 100.0  | N/A |
| pB409_A-110 | 5p/3p    | <a href="#">Homo sapiens - ICMT</a>     | 3969..4376       | X IF   |       | 99.5   | 100.0  | N/A |
| pB409_A-88  | 5p/3p    | <a href="#">Homo sapiens - ISOC2</a>    | -85..772         | X IF   |       | 96.5   | 98.2   | C   |
| pB409_A-73  | 5p/3p    | <a href="#">Homo sapiens - ISOC2</a>    | -82..679         | X IF   |       | 96.9   | 98.1   | C   |
| pB409_A-26  | 5p/3p    | <a href="#">Homo sapiens - KDM2A</a>    | 42..569          | IF     |       | 100.0  | 99.8   | D   |
| pB409_A-101 | 5p       | <a href="#">Homo sapiens - MKNK2</a>    | 72               | IF     |       | 92.9   |        | A   |
| pB409_A-170 | 5p/3p    | <a href="#">Homo sapiens - MKNK2</a>    | 105..1303        | X IF   |       | 97.0   | 100.0  | A   |
| pB409_A-76  | 5p/3p    | <a href="#">Homo sapiens - MKNK2</a>    | 117..1299        | X IF   |       | 96.3   | 97.4   | A   |
| pB409_A-171 | 5p/3p    | <a href="#">Homo sapiens - MKNK2</a>    | 117..1299        | X IF   |       | 96.5   | 96.2   | A   |
| pB409_A-70  | 5p/3p    | <a href="#">Homo sapiens - MKNK2</a>    | 204..1301        | X IF   |       | 98.3   | 97.4   | A   |
| pB409_A-11  | 5p/3p    | <a href="#">Homo sapiens - MKNK2</a>    | 204..1301        | X IF   |       | 98.9   | 97.6   | A   |
| pB409_A-147 | 5p/3p    | <a href="#">Homo sapiens - MTRNR2L2</a> | -832..-396       | X IF   |       | 95.5   | 96.1   | N/A |
| pB409_A-13  | 5p/3p    | <a href="#">Homo sapiens - PDE4D</a>    | 1152..2116       | IF     |       | 96.6   | 98.2   | D   |
| pB409_A-94  | 5p/3p    | <a href="#">Homo sapiens - PDE4D</a>    | 1152..2116       | IF     |       | 97.4   | 98.7   | D   |
| pB409_A-68  | 5p/3p    | <a href="#">Homo sapiens - PDE4D</a>    | 1152..2116       | IF     |       | 96.2   | 98.0   | D   |
| pB409_A-16  | 5p/3p    | <a href="#">Homo sapiens - PECL</a>     | -73..922         | IF     |       | 96.6   | 92.6   | D   |
| pB409_A-14  | 5p/3p    | <a href="#">Homo sapiens - PECL</a>     | -73..922         | IF     |       | 97.2   | 96.5   | D   |
| pB409_A-95  | 5p/3p    | <a href="#">Human - PECCR</a>           | -55..926         | X IF   |       | 99.7   | 98.1   | D   |
| pB409_A-137 | 5p/3p    | <a href="#">Human - PECCR</a>           | -55..926         | X IF   |       | 98.0   | 96.4   | D   |
| pB409_A-208 | 5p/3p    | <a href="#">Homo sapiens - PRDM15</a>   | 3135..4083       | IF     |       | 98.9   | 98.1   | E   |
| pB409_A-104 | 5p       | <a href="#">Homo sapiens - RBBP5</a>    | 260              | OOF2   |       | 96.6   |        | N/A |
| pB409_A-153 | 3p       | <a href="#">Homo sapiens - SEC31A</a>   | 3584..3945       | X OOF2 |       |        | 99.4   | N/A |
| pB409_A-206 | 5p/3p    | <a href="#">Homo sapiens - SIRT6</a>    | 6..821           | IF     |       | 98.0   | 98.2   | B   |
| pB409_A-194 | 5p/3p    | <a href="#">Homo sapiens - SIRT6</a>    | 9..1034          | IF     |       | 95.8   | 97.6   | B   |
| pB409_A-169 | 5p/3p    | <a href="#">Homo sapiens - SIRT6</a>    | 42..920          | IF     |       | 94.7   | 96.9   | B   |
| pB409_A-183 | 5p/3p    | <a href="#">Homo sapiens - SIRT6</a>    | 42..920          | IF     |       | 97.7   | 98.1   | B   |
| pB409_A-46  | 3p       | <a href="#">Homo sapiens - SMURF1</a>   | ..1361           | ??     |       |        | 80.3   | N/A |
| pB409_A-22  | 5p/3p    | <a href="#">Homo sapiens - SMURF1</a>   | -310..1439       | IF     |       | 98.2   | 93.7   | E   |
| pB409_A-134 | 5p/3p    | <a href="#">Homo sapiens - SMURF1</a>   | -310..1439       | IF     |       | 85.3   | 98.0   | E   |
| pB409_A-138 | 5p/3p    | <a href="#">Homo sapiens - SMURF1</a>   | -310..1439       | IF     |       | 99.9   | 88.9   | E   |

| Clone Name  | Type Seq | Gene Name (Best Match)                  | Start..Stop (nt) | Frame | Sense | %Id 5p | %Id 3p | PBS |
|-------------|----------|-----------------------------------------|------------------|-------|-------|--------|--------|-----|
| pB409_A-28  | 5p       | <a href="#">Homo sapiens - SMURF1</a>   | -26              | OOF2  |       | 92.7   |        | E   |
| pB409_A-127 | 5p/3p    | <a href="#">Homo sapiens - SNRNP200</a> | 5133..5259       | IF    |       | 71.8   | 97.4   | D   |
| pB409_A-10  | 5p/3p    | <a href="#">Homo sapiens - TMED4</a>    | 298..689         | ✗     | OOF1  | 97.4   | 99.5   | N/A |
| pB409_A-108 | 5p/3p    | <a href="#">Homo sapiens - ZFX</a>      | 1275..1868       | IF    |       | 99.5   | 99.8   | D   |
| pB409_A-93  | 3p       | <a href="#">Homo sapiens - ZNF219</a>   | ..1632           | ??    |       |        | 94.6   | E   |
| pB409_A-65  | 5p/3p    | <a href="#">Homo sapiens - ZNF219</a>   | 675..1626        | IF    |       | 99.6   | 95.9   | E   |
| pB409_A-12  | 3p       | <a href="#">Homo sapiens - ZNF236</a>   | ..3387           | ??    |       |        | 97.8   | B   |
| pB409_A-161 | 5p/3p    | <a href="#">Homo sapiens - ZNF236</a>   | 1890..3387       | IF    |       | 97.5   | 98.3   | B   |
| pB409_A-135 | 5p/3p    | <a href="#">Homo sapiens - ZNF236</a>   | 1890..3387       | IF    |       | 97.7   | 96.1   | B   |
| pB409_A-29  | 5p/3p    | <a href="#">Homo sapiens - ZNF236</a>   | 2694..3810       | IF    |       | 97.2   | 97.4   | B   |
| pB409_A-139 | 5p/3p    | <a href="#">Homo sapiens - ZNF236</a>   | 2694..3810       | IF    |       | 95.8   | 98.0   | B   |
| pB409_A-84  | 5p/3p    | <a href="#">Homo sapiens - ZNF236</a>   | 2694..3810       | IF    |       | 99.1   | 99.2   | B   |
| pB409_A-213 | 5p/3p    | <a href="#">Homo sapiens - ZNF267</a>   | 888..1336        | IF    |       | 100.0  | 99.6   | D   |
| pB409_A-99  | 5p       | <a href="#">Homo sapiens - ZNF584</a>   | 147              | IF    |       | 95.6   |        | B   |
| pB409_A-79  | 5p/3p    | <a href="#">Homo sapiens - ZNF584</a>   | 147..1686        | ✗     | IF    | 85.0   | 98.3   | B   |
| pB409_A-198 | 5p/3p    | <a href="#">Homo sapiens - ZNF584</a>   | 513..1233        | IF    |       | 95.8   | 97.1   | B   |
| pB409_A-195 | 5p/3p    | <a href="#">Homo sapiens - ZNF584</a>   | 513..1233        | IF    |       | 95.7   | 98.1   | B   |
| pB409_A-85  | 5p/3p    | <a href="#">Homo sapiens - GenMatch</a> | -1..87           | ✗     | IF    | 100.0  | 100.0  | D   |

## Results Summary

### YChemH SCREEN TMP-PEG5 - OCT140805 / HBX129659 vs Zebrafish Embryo\_RP1 (18-20 hpf)

Mon, Nov 21, 2016 - 10:47 AM

#### Screen Parameters

|                       |                                              |
|-----------------------|----------------------------------------------|
| Nature                | cDNA                                         |
| Reference Bait        | TMP-PEG5 - OCT140805 / HBX129659 ; hgx4366v1 |
| Prey Library          | Zebrafish Embryo_RP1 (18-20 hpf)             |
| Vector(s)             | pB409 (N-LexA-eDHFR-C)                       |
| Processed Clones      | 54 (pB409_A)                                 |
| Analyzed Interactions | 122 millions (pB409_A)                       |
| 3AT Concentration     | 0.0 mM (pB409_A)                             |

#### Global PBS®

| Global PBS (for Interactions represented in the Screen) |                                                                                                                                                                                                                                                                                                                                                                                                                  | Nb | %     |
|---------------------------------------------------------|------------------------------------------------------------------------------------------------------------------------------------------------------------------------------------------------------------------------------------------------------------------------------------------------------------------------------------------------------------------------------------------------------------------|----|-------|
| <b>A</b>                                                | Very high confidence in the interaction                                                                                                                                                                                                                                                                                                                                                                          | 2  | 9.5%  |
| <b>B</b>                                                | High confidence in the interaction                                                                                                                                                                                                                                                                                                                                                                               | 1  | 4.8%  |
| <b>C</b>                                                | Good confidence in the interaction                                                                                                                                                                                                                                                                                                                                                                               | 1  | 4.8%  |
| <b>D</b>                                                | Moderate confidence in the interaction<br>This category is the most difficult to interpret because it mixes two classes of interactions :<br>- False-positive interactions<br>- Interactions hardly detectable by the Y2H technique (low representation of the mRNA in the library, prey folding, prey toxicity in yeast)                                                                                        | 17 | 81.0% |
| <b>E</b>                                                | Interactions involving highly connected prey domains, warning of non-specific interaction. The threshold for high connectivity is 6. They can be classified in different categories:<br>- Prey proteins that are known to be highly connected due to their biological function<br>- Proteins with a prey interacting domain that contains a known protein interaction motif or a biochemically promiscuous motif | 0  | 0.0%  |
| <b>F</b>                                                | Experimentally proven technical artifacts                                                                                                                                                                                                                                                                                                                                                                        | 0  | 0.0%  |
| <b>Non Applicable</b>                                   |                                                                                                                                                                                                                                                                                                                                                                                                                  |    |       |
| N/A                                                     | The PBS is a score that is automatically computed through algorithms and cannot be attributed for the following reasons :<br>- All the fragments of the same reference CDS are antisense<br>- The 5p sequence is missing<br>- All the fragments of the same reference CDS are either all OOF1 or all OOF2<br>- All the fragments of the same reference CDS lie in the 5' or 3' UTR                               |    |       |

## Prey Fragment Analysis

| Symbols                                                                           | Means                                                                                                                                                                                                                                                                                                                                                                                                                                                                                   |
|-----------------------------------------------------------------------------------|-----------------------------------------------------------------------------------------------------------------------------------------------------------------------------------------------------------------------------------------------------------------------------------------------------------------------------------------------------------------------------------------------------------------------------------------------------------------------------------------|
| ✱                                                                                 | The fragment contains the full length CDS                                                                                                                                                                                                                                                                                                                                                                                                                                               |
|  | Fragment is fully in 5' UTR                                                                                                                                                                                                                                                                                                                                                                                                                                                             |
|  | Fragment is fully in 3' UTR                                                                                                                                                                                                                                                                                                                                                                                                                                                             |
| ✘                                                                                 | Fragment contains at least one In Frame STOP codon                                                                                                                                                                                                                                                                                                                                                                                                                                      |
| [NR]                                                                              | Fragment was found to be non relevant (poor quality, high N density)                                                                                                                                                                                                                                                                                                                                                                                                                    |
| IF<br>OOF1<br>OOF2                                                                | With regard to the theoretical frame of each corresponding CDS (GeneBank), fragments are cloned in frame (IF) if they are in the same frame as Gal4AD. In general, polypeptides synthesized from OOF fragments are not considered of biological interest, unless found together with another frame. However, some of the proteins expressed from an OOF fragment can be translated in the correct frame, due to the existence of natural frame-shift events during translation in yeast |
| ??                                                                                | Unidentified frame when :<br>- The clone sequence is antisense<br>- The 5p sequence is missing                                                                                                                                                                                                                                                                                                                                                                                          |
| N                                                                                 | Antisense                                                                                                                                                                                                                                                                                                                                                                                                                                                                               |
| Start...Stop                                                                      | Position of the 5p and 3p prey fragment ends, relative to the position of the ATG start codon (A=0)                                                                                                                                                                                                                                                                                                                                                                                     |

| Clone Name  | Type Seq | Gene Name (Best Match)                     | Start..Stop (nt) | Frame | Sense | %Id 5p | %Id 3p | PBS |
|-------------|----------|--------------------------------------------|------------------|-------|-------|--------|--------|-----|
| pB409_A-39  | 5p/3p    | <a href="#">Danio rerio - LOC100333857</a> | 30..865 ✘        | IF    |       | 96.3   | 95.9   | D   |
| pB409_A-130 | 5p/3p    | <a href="#">Danio rerio - LOC100333857</a> | 30..865 ✘        | IF    |       | 97.5   | 96.9   | D   |
| pB409_A-52  | 5p/3p    | <a href="#">Danio rerio - LOC103909511</a> | 492..985         | IF    |       | 100.0  | 99.2   | D   |
| pB409_A-103 | 3p       | <a href="#">Danio rerio - LOC108183936</a> | ..1049           | ??    |       |        | 98.3   | D   |
| pB409_A-232 | 5p/3p    | <a href="#">Danio rerio - LOC108183936</a> | 591..1049        | IF    |       | 98.9   | 98.9   | D   |
| pB409_A-335 | 5p/3p    | <a href="#">Danio rerio - LOC559111</a>    | 33..1260         | IF    |       | 95.9   | 96.7   | D   |
| pB409_A-238 | 5p/3p    | <a href="#">Danio rerio - LOC560099</a>    | 3126..4216       | IF    |       | 94.9   | 85.7   | D   |
| pB409_A-360 | 5p/3p    | <a href="#">Danio rerio - LOC567317</a>    | -1..874          | IF    |       | 95.0   | 91.6   | D   |
| pB409_A-209 | 5p/3p    | <a href="#">Danio rerio - acin1b</a>       | 2568..3337       | IF    |       | 96.2   | 97.0   | A   |
| pB409_A-233 | 5p/3p    | <a href="#">Danio rerio - acin1b</a>       | 2592..3316       | IF    |       | 98.5   | 97.4   | A   |
| pB409_A-284 | 5p/3p    | <a href="#">Danio rerio - acin1b</a>       | 2592..3316       | IF    |       | 99.0   | 97.5   | A   |
| pB409_A-243 | 5p/3p    | <a href="#">Danio rerio - acin1b</a>       | 2655..3232       | IF    |       | 99.7   | 98.3   | A   |
| pB409_A-208 | 5p/3p    | <a href="#">Danio rerio - acin1b</a>       | 2676..3288       | IF    |       | 99.5   | 98.5   | A   |
| pB409_A-236 | 5p/3p    | <a href="#">Danio rerio - acin1b</a>       | 2676..3288       | IF    |       | 99.5   | 99.0   | A   |
| pB409_A-169 | 5p/3p    | <a href="#">Danio rerio - acin1b</a>       | 2676..3288       | IF    |       | 99.5   | 98.2   | A   |
| pB409_A-222 | 5p/3p    | <a href="#">Danio rerio - acin1b</a>       | 2682..3488       | IF    |       | 96.6   | 97.6   | A   |
| pB409_A-289 | 5p/3p    | <a href="#">Danio rerio - acin1b</a>       | 2682..3488       | IF    |       | 96.0   | 96.9   | A   |
| pB409_A-213 | 5p/3p    | <a href="#">Danio rerio - acin1b</a>       | 2730..3553       | IF    |       | 93.7   | 98.4   | A   |

| Clone Name  | Type Seq | Gene Name (Best Match)                          | Start..Stop (nt) | Frame | Sense | %Id 5p | %Id 3p | PBS |
|-------------|----------|-------------------------------------------------|------------------|-------|-------|--------|--------|-----|
| pB409_A-318 | 5p/3p    | <a href="#">Danio rerio - acin1b</a>            | 2730..3553       | IF    |       | 97.7   | 92.3   | A   |
| pB409_A-171 | 5p/3p    | <a href="#">Danio rerio - ctslb</a>             | 525..26          | ??    | N     | 99.8   | 99.8   | N/A |
| pB409_A-278 | 5p/3p    | <a href="#">Danio rerio - drl</a>               | 426..1316        | X     | IF    | 95.8   | 96.2   | A   |
| pB409_A-80  | 5p/3p    | <a href="#">Danio rerio - drl</a>               | 588..1154        | IF    |       | 99.6   | 98.1   | A   |
| pB409_A-74  | 5p/3p    | <a href="#">Danio rerio - drl</a>               | 588..1154        | IF    |       | 99.8   | 99.6   | A   |
| pB409_A-353 | 5p/3p    | <a href="#">Danio rerio - drl</a>               | 615..1085        | IF    |       | 98.5   | 98.3   | A   |
| pB409_A-345 | 5p       | <a href="#">Danio rerio - drl</a>               | 615              | IF    |       | 95.0   |        | A   |
| pB409_A-287 | 5p/3p    | <a href="#">Danio rerio - drl</a>               | 615..1085        | IF    |       | 98.5   | 98.5   | A   |
| pB409_A-152 | 5p       | <a href="#">Danio rerio - drl</a>               | 639              | IF    |       | 88.2   |        | A   |
| pB409_A-122 | 5p/3p    | <a href="#">Danio rerio - drl</a>               | 639..1338        | X     | IF    | 96.6   | 95.3   | A   |
| pB409_A-253 | 5p/3p    | <a href="#">Danio rerio - drl</a>               | 639..1338        | X     | IF    | 97.9   | 95.3   | A   |
| pB409_A-151 | 3p       | <a href="#">Danio rerio - exoc6b</a>            | ..2288           | ??    |       |        | 100.0  | D   |
| pB409_A-20  | 5p/3p    | <a href="#">Danio rerio - exoc6b</a>            | 459..2288        | IF    |       | 98.9   | 98.1   | D   |
| pB409_A-64  | 5p/3p    | <a href="#">Danio rerio - exoc6b</a>            | 459..2288        | IF    |       | 99.2   | 97.1   | D   |
| pB409_A-7   | 5p/3p    | <a href="#">Danio rerio - exoc6b</a>            | 459..2288        | IF    |       | 90.0   | 97.8   | D   |
| pB409_A-167 | 5p/3p    | <a href="#">Danio rerio - exoc6b</a>            | 459..2288        | IF    |       | 99.0   | 98.4   | D   |
| pB409_A-239 | 5p/3p    | <a href="#">Danio rerio - exoc6b</a>            | 459..2288        | IF    |       | 99.0   | 99.8   | D   |
| pB409_A-172 | 5p       | <a href="#">Danio rerio - kdm2ab</a>            | 1164             | IF    |       | 99.7   |        | D   |
| pB409_A-177 | 5p/3p    | <a href="#">Danio rerio - kmt2ba</a>            | 4086..5053       | IF    |       | 96.5   | 100.0  | D   |
| pB409_A-49  | 5p/3p    | <a href="#">Danio rerio - osbpl3b</a>           | 1215..3110       | X     | IF    | 99.7   | 99.7   | D   |
| pB409_A-13  | 5p/3p    | <a href="#">Danio rerio - pax6b</a>             | 312..903         | IF    |       | 100.0  | 100.0  | D   |
| pB409_A-92  | 5p/3p    | <a href="#">Danio rerio - pif1</a>              | 15..434          | IF    |       | 98.8   | 98.8   | D   |
| pB409_A-113 | 5p/3p    | <a href="#">Danio rerio - pls3</a>              | 138..1358        | IF    |       | 93.4   | 98.1   | C   |
| pB409_A-42  | 5p/3p    | <a href="#">Danio rerio - pls3</a>              | 297..1538        | IF    |       | 97.7   | 97.5   | C   |
| pB409_A-294 | 5p/3p    | <a href="#">Danio rerio - ppp2r5cb</a>          | 1691..337        | ??    | N     | 98.2   | 97.2   | N/A |
| pB409_A-73  | 5p/3p    | <a href="#">Danio rerio - prdm15</a>            | 1602..2573       | IF    |       | 97.2   | 96.4   | D   |
| pB409_A-293 | 5p/3p    | <a href="#">Danio rerio - safb</a>              | 1113..2102       | IF    |       | 99.1   | 97.5   | D   |
| pB409_A-336 | 5p/3p    | <a href="#">Danio rerio - si:ch211-212k18.5</a> | 1932..2691       | IF    |       | 99.7   | 99.2   | D   |
| pB409_A-51  | 5p/3p    | <a href="#">Danio rerio - stil</a>              | 75..1132         | IF    |       | 97.1   | 97.8   | D   |
| pB409_A-124 | 5p/3p    | <a href="#">Danio rerio - stil</a>              | 75..1132         | IF    |       | 94.1   | 97.6   | D   |
| pB409_A-140 | 5p/3p    | <a href="#">Danio rerio - vars</a>              | 2700..3268       | IF    |       | 99.5   | 99.3   | B   |
| pB409_A-137 | 5p/3p    | <a href="#">Danio rerio - vars</a>              | 2700..3268       | IF    |       | 99.5   | 99.3   | B   |
| pB409_A-295 | 5p/3p    | <a href="#">Danio rerio - vars</a>              | 2700..3268       | IF    |       | 99.5   | 99.5   | B   |
| pB409_A-240 | 5p/3p    | <a href="#">Danio rerio - vars</a>              | 2799..3328       | IF    |       | 99.4   | 99.4   | B   |
| pB409_A-248 | 5p/3p    | <a href="#">Danio rerio - zgc:64002</a>         | 12..835          | X     | IF    | 97.7   | 94.3   | D   |



| Clone Name  | Type Seq | Gene Name (Best Match)                  | Start..Stop (nt) | Frame | Sense | %Id 5p | %Id 3p | PBS |
|-------------|----------|-----------------------------------------|------------------|-------|-------|--------|--------|-----|
| pB409_A-286 | 5p/3p    | <a href="#">Danio rerio - zgc:64002</a> | 12..835          | ×     | IF    | 99.4   | 98.9   | D   |
