# Supplementary material
Source: PubMed Central journal article supplement (PMC9395273)

Supplementary Fig 7k

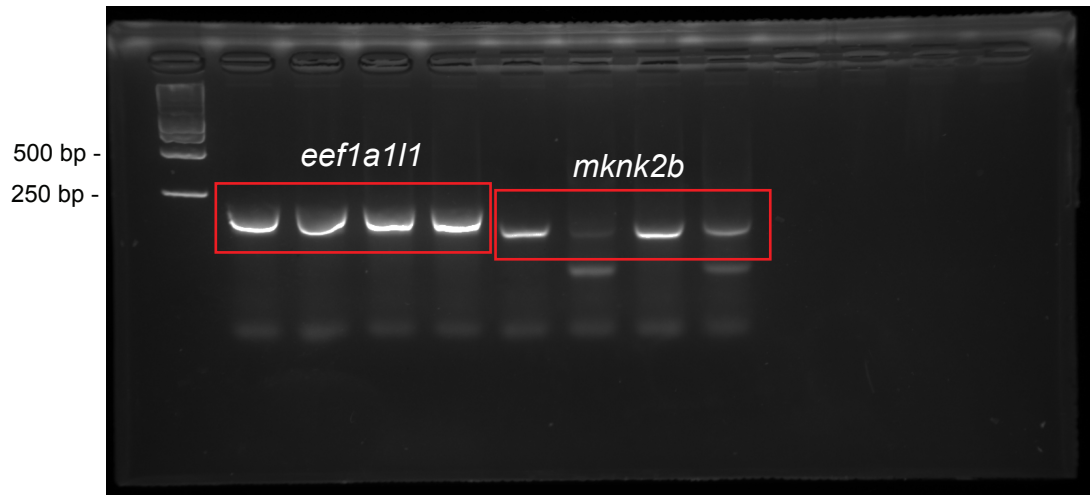

Supplementary Fig 7l

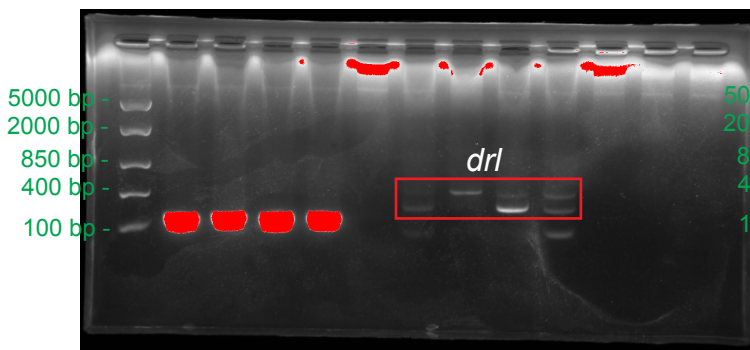

Supplementary Fig 7l (same gel different exposure)

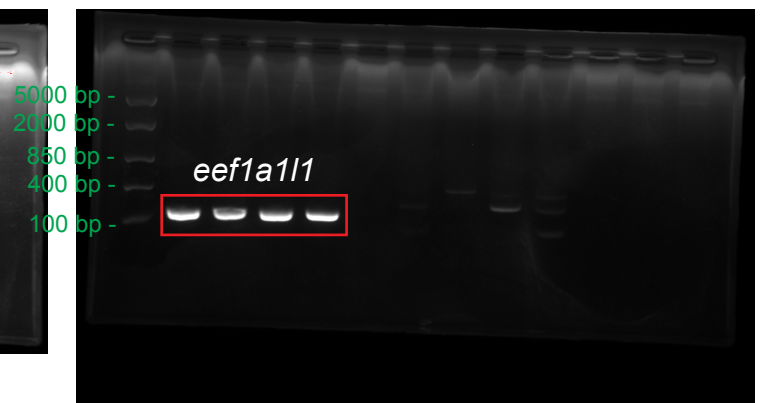

Supplementary Fig 7m

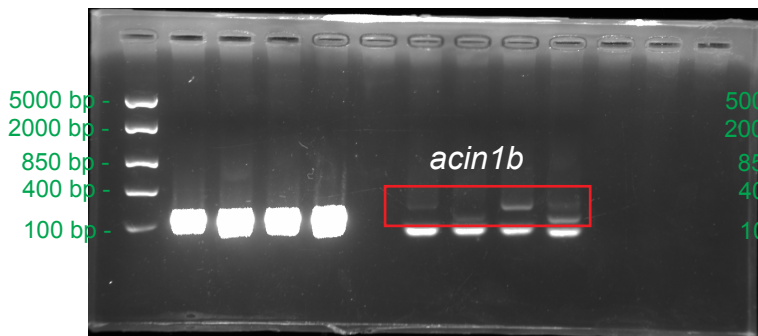

Supplementary Fig 7m (same gel different exposure)

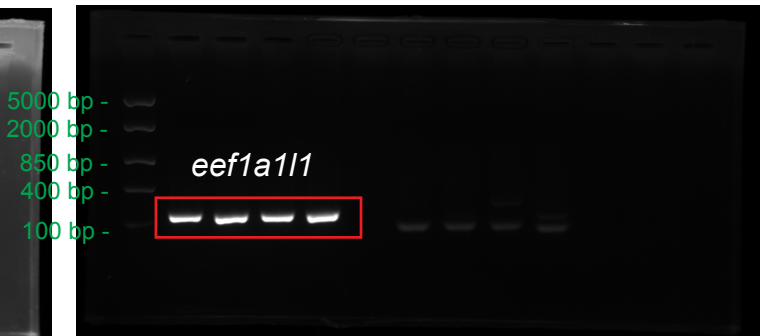

Supplement: 41589_2022_1047_MOESM18_ESM.pdf [file 41589_2022_1047_MOESM18_ESM.pdf]
